# Predicting personality traits from resting-state fMRI

Julien Dubois<sup>1,4,\*</sup>, Paola Galdi<sup>5,\*</sup>, Yanting Han<sup>2</sup>, Lynn K. Paul<sup>1</sup>, Ralph Adolphs<sup>1,2,3</sup>

\* equal contribution

<sup>1</sup> Division of Humanities and Social Sciences,

<sup>2</sup> Division of Biology and Biological engineering,

<sup>3</sup> Chen Neuroscience Institute, California Institute of Technology, Pasadena CA 91125, USA

<sup>4</sup> Department of Neurosurgery, Cedars-Sinai Medical Center, Los Angeles, CA 90048, USA

<sup>5</sup> Department of Management and Innovation Systems, University of Salerno, Fisciano, Salerno, Italy

Correspondence:

Julien Dubois

Department of Neurosurgery

Cedars-Sinai Medical Center, Los Angeles, CA 90048

[jcrdubois@gmail.com](mailto:jcrdubois@gmail.com)

## Abstract

Personality neuroscience aims to find associations between brain measures and personality traits. Findings to date have been severely limited by a number of factors, including small sample size and omission of out-of-sample prediction. We capitalized on the recent availability of a large database, together with the emergence of specific criteria for best practices in neuroimaging studies of individual differences. We analyzed resting-state functional magnetic resonance imaging data from 867 young healthy adults in the Human Connectome Project (HCP) database. We attempted to predict personality traits from the “Big Five”, as assessed with the NEO-FFI test, using individual functional connectivity matrices. After regressing out potential confounds such as age, sex, and IQ, we used a cross-validated framework, together with test-retest replication, to quantify how well the neuroimaging data could predict each of the five personality factors, as well as two superordinate factors (“ $\alpha$ ” and “ $\beta$ ”). To obtain a more comprehensive set of findings, we tested three different preprocessing pipelines for the fMRI data, two brain parcellation schemes, and two different linear models for prediction. Across all 24 results (test/retest; 3 processing pipelines; 2 parcellation schemes; 2 models) we found no consistent evidence for predictability for any of the five personality traits with the exception of Openness, and the superordinate  $\beta$  factor (“personal growth/ plasticity”). As a benchmark, we showed that we could replicate prior reports of predicting IQ from the same dataset. Best predictions in all cases were around  $r=0.2$ , thus only accounting for about 4% of the variance. We conclude with a discussion of the potential for predicting personality from neuroimaging data and make specific recommendations for the field.

## Introduction

Personality refers to the relatively stable disposition of an individual that influences long-term behavioral style (Back, Schmukle, & Egloff, 2009; Furr, 2009; Hong, Paunonen, & Slade, 2008; Jaccard, 1974). It is especially conspicuous in social interactions, and in emotional expression. It is what we pick up on when we observe a person for an extended time, and what leads us to make predictions about general tendencies in behaviors and interactions in the future. Often, these predictions are inaccurate stereotypes, and they can be evoked even by very fleeting impressions, such as merely looking at photographs of people (Todorov, 2017). Yet there is also good reliability (Viswesvaran & Ones, 2000) and consistency (B. W. Roberts & DelVecchio, 2000) for many personality traits currently used in psychology, which can predict real-life outcomes (Brent W. Roberts, Kuncel, Shiner, Caspi, & Goldberg, 2007).

There are strong arguments for the biological basis of personality traits. Many of the personality traits similar to those used to describe human dispositions can be applied to animal behavior as well, and again they make some predictions about real-life outcomes (Gosling & John, 1999; Gosling & Vazire, 2002). For instance, anxious temperament has been a major topic of study in monkeys, as a model of human mood disorders. Hyenas show neuroticism in their behavior, and also show sex differences in this trait as would be expected from human data (in humans, females tend to be more neurotic than males; in hyenas, the females are socially dominant and the males are more neurotic). Personality traits are also highly heritable. Anxious temperament in monkeys is heritable and its neurobiological basis is being intensively investigated (Oler et al., 2010). Twin studies in humans typically report heritability estimates for each trait between .4 and .6 (Bouchard & McGue, 2003; Jang, Livesley, & Vernon, 1996; Verweij et al., 2010), even though no specific genes account much variance (studies using common single-nucleotide polymorphisms (SNPs) report estimates between 0 and 0.2 (R. A. Power & Pluess, 2015; Vinkhuyzen et al., 2012)).

The proximal cause of personality must come from brain-environment interactions, since these are the basis for all behavior. Some aspects of personality have been linked to specific neural systems -- for instance, behavioral inhibition and anxious temperament have been linked to a system involving the medial temporal lobe and the prefrontal cortex (Birn et al., 2014). Although there is now universal agreement that personality is generated through brain function in a given context, it is much less clear what type of brain measure might be the best predictor of personality. Neurotransmitters, cortical thickness or volume of certain regions, and functional measures have all been explored with respect to their correlation with personality traits (see (Turhan Canli, 2006; Yarkoni., 2015) for reviews). We briefly summarize this literature next.

## The search for neurobiological substrates of personality traits

Since personality traits are stable over time, one might expect that brain measures that are similarly stable over time are the most promising candidates for predicting such traits. The first types of measures to look at may thus be structural, connectional and neurochemical; indeed a number of such studies have reported correlations with personality differences. Here

we briefly review studies using structural and functional magnetic resonance imaging (MRI) of humans, and leave aside research on neurotransmission (see (Turhan Canli, 2006; Yarkoni., 2015) for more exhaustive reviews). Although a number of different personality traits have been investigated, we emphasize those most similar to the “Big Five”, since they are the topic of the present paper (see below).

## Structural MRI studies

Many structural MRI studies of personality to date have used voxel-based morphometry (VBM) (Blankstein, Chen, Mincic, McGrath, & Davis, 2009; Coutinho, Sampaio, Ferreira, Soares, & Gonçalves, 2013; DeYoung et al., 2010; Hu et al., 2011; Kapogiannis, Sutin, Davatzikos, Costa, & Resnick, 2013; W.-Y. Liu et al., 2013; Lu et al., 2014; Omura, Todd Constable, & Canli, 2005; Taki et al., 2013), a technique based on spatially warping high-resolution structural scans from all the subjects into the same volumetric template, segmenting the gray matter, and then performing a voxel-wise comparison of the local concentration of gray matter across subjects (Ashburner & Friston, 2000). Results from these studies have been quite variable, sometimes even contradictory (e.g., the volume of the posterior cingulate cortex has been found to be both positively and negatively correlated with agreeableness (Coutinho et al., 2013; DeYoung et al., 2010)). Methodologically, this is in part due to the rather small sample sizes (typically less than 100; 116 in (DeYoung et al., 2010), 52 in (Coutinho et al., 2013)) which undermine replicability (Button et al., 2013); studies with larger sample sizes (W.-Y. Liu et al., 2013) typically fail to replicate previous results. We will take up the important issue of replicability again in the Discussion.

More recently, surface-based morphometry (SBM) has emerged as a promising measure to study structural brain correlates of personality (Bjørnebekk et al., 2013; Holmes et al., 2012; Rauch et al., 2005; Riccelli, Toschi, Nigro, Terracciano, & Passamonti, 2017; Wright et al., 2006). It has the advantage of disentangling several geometric aspects of brain structure which may contribute to differences detected in VBM, such as cortical thickness (Hutton, Draganski, Ashburner, & Weiskopf, 2009), cortical volume, and folding. Although many studies using SBM are once again limited by small sample sizes, one recent study (Riccelli et al., 2017) used 507 subjects to investigate personality. However, that study raises several other important methodological limitations, to which we will return later in our paper. Perhaps most notably, Riccelli et al. (2017) used a purely correlational, rather than a predictive framework (Dubois & Adolphs, 2016; Woo, Chang, Lindquist, & Wager, 2017; Yarkoni & Westfall, 2017). There was no assessment of the generalizability of the findings, and most of the reported relationships may thus have resulted simply from overfitting the study sample, together with potentially questionable statistical thresholding (Woo, Krishnan, & Wager, 2014).

There is much room for improvement in structural MRI studies of personality traits. The limitation of small sample sizes can now be overcome, since all MRI studies regularly collect structural scans, and recent consortia and data sharing efforts have led to the accumulation of large publicly available datasets (Job et al., 2017; Miller et al., 2016; Van Essen et al., 2013). One could imagine a mechanism by which personality assessments, if not available already within these datasets, are collected later (Mar, Spreng, & Deyoung, 2013), yielding large samples for relating structural MRI to personality. Lack of out-of-sample generalizability, a

limitation of almost all studies that we raised above, can be overcome using cross-validation techniques, or by setting aside a replication sample. In short: despite a considerable historical literature that has investigated the association between personality traits and structural MRI measures, there are as yet no very compelling findings because prior studies have been unable to surmount this list of limitations.

## Diffusion MRI studies

Diffusion Tensor Imaging (DTI) is a neuroimaging method that measures the diffusion of water molecules along axonal fibers to identify white matter tracts (Le Bihan et al., 2001). Several studies have looked for a relationship between white-matter integrity as assessed by DTI and personality factors (Cohen, Schoene-Bake, Elger, & Weber, 2008; Kim & Whalen, 2009; Westlye, Bjørnebekk, Grydeland, Fjell, & Walhovd, 2011; Xu & Potenza, 2012). As with structural MRI studies, extant focal findings fail to replicate with larger samples of subjects which tend to find more widespread differences linked to personality traits (Bjørnebekk et al., 2013). The same concerns mentioned in the previous section, in particular the lack of a predictive framework (e.g., using cross-validation), plague this literature; similar recommendations can be made to increase the reproducibility of this line of research, in particular aggregating data (Miller et al., 2016; Van Essen et al., 2013) and using prediction rather than correlation (Yarkoni & Westfall, 2017).

## Functional MRI studies

Functional MRI (fMRI) measures local changes in blood flow and blood oxygenation as a surrogate of the metabolic demands due to neuronal activity (Logothetis & Wandell, 2004). There are two main paradigms that have been used to relate fMRI data to personality traits: task-based fMRI and resting-state fMRI.

Task-based fMRI studies are based on the assumption that differences in personality may affect information-processing in specific tasks (Yarkoni, 2015). Personality dimensions are tentatively mapped onto cognitive mechanisms, whose neural correlates can be studied with fMRI. For example, differences in neuroticism may materialize as differences in emotional reactivity, which can then be mapped onto the brain (T. Canli et al., 2001). There is a very large literature on task-fMRI substrates of personality, which is beyond the scope of this overview. In general, some of the same concerns we raised above also apply to task-fMRI studies, which typically have even smaller sample sizes (Yarkoni, 2009), greatly limiting power to detect individual differences (in personality or any others). Several additional concerns on the validity of fMRI-based individual differences research apply (Dubois & Adolphs, 2016) and a new challenge arises as well: whether the task used has construct validity for a personality trait.

The other paradigm, resting-state fMRI, offers a solution to the sample size problem, as resting-state data is often collected alongside other data, and can easily be aggregated in large online databases (Biswal et al., 2010; Eickhoff, Nichols, Van Horn, & Turner, 2016; Poldrack & Gorgolewski, 2015; Van Horn & Gazzaniga, 2013). It is the type of data we used in the present paper. Resting-state data does not explicitly engage cognitive processes that are thought to be related to personality traits. Instead, it is used to study correlated self-generated activity

between brain areas while a subject is at rest. These correlations, which can be highly reliable given enough data (Finn et al., 2015; Laumann et al., 2015; Noble et al., 2017), are thought to reflect stable aspects of brain organization (Xilin Shen et al., 2017; S. M. Smith et al., 2013). There is a large ongoing effort to link individual variations in functional connectivity (FC) assessed with resting-state fMRI to individual traits and psychiatric diagnosis (for reviews see (Dubois & Adolphs, 2016; Orrù, Pettersson-Yeo, Marquand, Sartori, & Mechelli, 2012; S. M. Smith et al., 2013; Woo et al., 2017).

A number of recent studies have investigated functional connectivity markers from resting-state fMRI and their association with personality traits (Adelstein et al., 2011; Aghajani et al., 2014; Baeken et al., 2014; Beaty et al., 2014, 2016; Gao et al., 2013; Jiao et al., 2017; Lei, Zhao, & Chen, 2013; Pang et al., 2016; Ryan, Sheu, & Gianaros, 2011; Takeuchi et al., 2012; Wu, Li, Yuan, & Tian, 2016). Somewhat surprisingly, these resting-state fMRI studies also suffer from low sample sizes (typically less than 100 subjects, usually about 40), and the lack of a predictive framework to assess effect size out-of-sample. One of the best extant datasets, the Human Connectome Project (HCP) has only in the past year reached its full sample of over 1000 subjects, now making large sample sizes readily available. To date, only the exploratory “MegaTrawl” (S. Smith et al., 2016) has investigated personality in this database; we believe that ours is the first comprehensive study of personality on the full HCP dataset.

## Measuring Personality

Although there are a number of different schemes and theories for quantifying personality traits, by far the most common and well validated one, and also the only one available for the Human Connectome Project dataset, is the five-factor solution of personality (aka “The Big Five”). This was originally identified through systematic examination of the adjectives in English language that are used to describe human traits. Based on the hypothesis that all important aspects of human personality are reflected in language, Raymond Cattell applied factor analysis to peer ratings of personality and identified 16 common personality factors (Cattell, 1945). Over the next 3 decades, multiple attempts to replicate Cattell’s study using a variety of methods (e.g. self-description and description of others with adjective lists and behavioral descriptions) agreed that the taxonomy of personality could be robustly described through a five-factor solution (Borgatta, 1964; Fiske, 1949; Norman, 1963; G. M. Smith, 1967; Tupes & Christal, 1961). Since the 1980s, the Big Five has emerged as the leading psychometric model in the field of personality psychology (Goldberg, 1981; Robert R. McCrae & John, 1992). The five factors are commonly termed “openness,” “conscientiousness,” “extraversion,” “agreeableness,” and “neuroticism.”

While the Big Five personality dimensions are not based on an independent theory of personality, and in particular have no basis in neuroscience theories of personality, proponents of the Big Five maintain that they provide the best empirically-based integration of the dominant theories of personality, encompassing the alternative theories of Cattell, Guilford and Eysenck (Amelang, Borkenau - Zeitschrift fuer Differentielle und, & 1982, 1982). Self-report questionnaires, such as the NEO-FFI (Robert R. McCrae & Costa, 2004), can be used to

reliably assess an individual with respect to these five factors. Even though there remain critiques of the Big Five (Block, 1995; Uher, 2015), its proponents argue that its five factors “are both necessary and reasonably sufficient for describing at a global level the major features of personality” (R. R. McCrae, Costa - American Psychologist, & 1986, 1986).

## The present study

As we emphasized above, personality neuroscience based on MRI data confronts two major challenges. First, essentially all studies to date have been severely underpowered due to small sample sizes (Button et al., 2013; Schönbrodt & Perugini, 2013; Yarkoni, 2009). Second, most studies have failed to use a predictive or replication framework (but see (Deris, Montag, Reuter, Weber, & Markett, 2017)), making their generalizability unclear -- a well-recognized problem in neuroscience studies of individual differences (Dubois & Adolphs, 2016; Gabrieli, Ghosh, & Whitfield-Gabrieli, 2015; Yarkoni & Westfall, 2017). The present paper takes these two challenges seriously by applying a predictive framework, together with a built-in replication, to a large, homogeneous resting-state fMRI dataset.

Our dataset, the Human Connectome Project resting-state fMRI data (HCP rs-fMRI) makes available over 1000 well assessed healthy adults. With respect to our study, it provided three types of relevant data: (1) high-quality resting-state fMRI (2 sessions per subject on separate days, each consisting of two 15 minute runs); (2) personality assessment for each subject (using the NEO-FFI 2); (3) additional basic cognitive assessment (IQ and others, as well as demographic information). (1) permitted replication between the sessions, (2) permitted analysis of item-wise scores (for instance, to derive superordinate personality factors, which we also explore), and (3) permitted careful elimination of possible confounds by regressing them out of the personality scores.

Our primary question was straightforward: given the challenges noted above, is it possible to find evidence that any personality trait can be reliably predicted from fMRI data, using the best available resting-state fMRI dataset together with the best current analysis methods? If the answer to this question is negative, this might suggest that studies to date that have claimed to find associations between resting-state fMRI and personality are false positives (but of course it would still leave open future positive findings, if more sensitive measures are available). If the answer is positive, it would provide an estimate of the effect size that can be expected in future studies; it would provide specific recommendations for data preprocessing, modeling, and statistical treatment; and it would provide a basis for hypothesis-driven investigations that could focus on particular traits and brain regions.

## Methods

### Dataset

We used data from a public repository, the 1200 subjects release of the Human Connectome Project (HCP) (Van Essen et al., 2013). The HCP provides MRI data and

extensive behavioral assessment from almost 1200 subjects. Acquisition parameters and “minimal” preprocessing of the resting-state fMRI data is described in the original publication (Glasser et al., 2013). Briefly, each subject underwent two sessions of resting-state fMRI on separate days, each session with two separate 15 minute acquisitions generating 1200 volumes (customized Siemens Skyra 3 Tesla MRI scanner, TR = 720 ms, TE = 33 ms, flip angle= 52°, voxel size = 2 mm isotropic, 72 slices, matrix = 104 x 90, FOV = 208 mm x 180 mm, multiband acceleration factor = 8). The two runs acquired on the same day differed in the phase encoding direction, left-right and right-left (which leads to differential signal intensity especially in ventral temporal and frontal structures). The HCP data was downloaded in its minimally preprocessed form, i.e. after motion correction, B<sub>0</sub> distortion correction, coregistration to T<sub>1</sub>-weighted images and normalization to MNI space.

## Personality assessment, and personality factors

The 60 item version of the Costa and McCrae Neuroticism/Extraversion/Openness Five Factor Inventory (NEO-FFI), which has shown excellent reliability and validity (Robert R. McCrae & Costa, 2004), was administered to HCP subjects. This measure was collected as part of the Penn Computerized Cognitive Battery (R. C. Gur et al., 2001; Ruben C. Gur et al., 2010). Note that the NEO-FFI was recently updated (NEO-FFI-3, 2010), but the test administered to the HCP subjects is the older version (NEO-FFI-2, 2004).

The NEO-FFI is a self-report questionnaire -- the abbreviated version of the 240-item Neuroticism / Extraversion / Openness Personality Inventory Revised (NEO-PI-R (Paul T. Costa & McCrae, 1992)). For each item, participants reported their level of agreement on a 5-point Likert scale, from strongly disagree to strongly agree.

The Openness, Conscientiousness, Extraversion, Agreeableness and Neuroticism scores are derived by coding each item’s answer (strongly disagree = 0; disagree = 1; neither agree nor disagree = 2; agree = 3; strongly agree = 4) and then reverse coding appropriate items and summing into subscales. As the item scores are available in the database, we recomputed the Big Five scores with the following item coding published in the NEO-FFI 2 manual, where \* denotes reverse coding :

- Openness: (3\*, 8\*, 13, 18\*, 23\*, 28, 33\*, 38\*, 43, 48\*, 53, 58)
- Conscientiousness: (5, 10, 15\*, 20, 25, 30\*, 35, 40, 45\*, 50, 55\*, 60)
- Extraversion: (2, 7, 12\*, 17, 22, 27\*, 32, 37, 42\*, 47, 52, 57\*)
- Agreeableness: (4, 9\*, 14\*, 19, 24\*, 29\*, 34, 39\*, 44\*, 49, 54\*, 59\*)
- Neuroticism: (1\*, 6, 11, 16\*, 21, 26, 31\*, 36, 41, 46\*, 51, 56)

We note that the Agreeableness factor score that we calculated was slightly discrepant with the score in the HCP database due to an error in the HCP database in not reverse-coding item 59 at that time (downloaded 06/07/2017). This issue was reported on the HCP listserv (Gray, 2017).

To test the internal consistency of each of the Big Five personality traits in our sample, Cronbach’s alpha was calculated.

Each of the Big Five personality traits can be decomposed into further facets (P. T. Costa Jr & McCrae, 1995), but we did not attempt to predict these facets from our data. Not only



does each facet rely on fewer items and thus constitutes a noisier measure; also, trying to predict many traits leads to a multiple comparison problem which then needs to be accounted for (for an extreme example, see the HCP “MegaTrawl” (S. Smith et al., 2016)).

As we found the Big Five to be correlated with one another in our sample of subjects, we performed a factor analysis (with varimax rotation) on the 60 item scores to extract two superordinate factors (Blackburn, Renwick, Donnelly, & Logan, 2004; DeYoung, 2006; Digman, 1997) often referred to in the literature as  $\{\alpha / \text{socialization} / \text{stability}\}$  and  $\{\beta / \text{personal growth} / \text{plasticity}\}$ . We also tested the predictability of these superordinate factors from the HCP rs-fMRI data, in addition to the original five factors, for a grand total of 7 personality dimensions.

While we used resting-state fMRI data from two separate sessions (typically collected on consecutive days), there was only a single set of behavioral data available; the NEO-FFI was typically administered on the same day as the second session of resting-state fMRI (Van Essen et al., 2013).

## IQ assessment

An estimate of fluid intelligence is available as the *PMAT24\_A\_CR* measure in the HCP dataset. This proxy for IQ is based on a short version of Raven’s progressive matrices (24 items) (Bilker et al., 2012); scores are integers indicating number of correct items. We used this IQ score for two purposes: i) as a benchmark comparison in our predictive analyses, since others have previously reported that this measure of IQ could be predicted from resting-state fMRI in the HCP dataset (Finn et al., 2015; Noble et al., 2017); ii) as a de-confounding variable (see “Assessment and removal of potential confounds” below).

## Subject selection

The total number of subjects in the 1200-subject release of the HCP dataset is  $N=1206$ . We applied the following criteria to include/exclude subjects from our analyses (listing in parentheses the HCP database field codes). **i) Complete datasets.** Subjects must have completed all resting-state fMRI scans (*3T\_RS-fMRI\_PctComp*=100), as well as the Raven’s matrices intelligence test (*PMAT\_Comp*=True), the NEO-FFI (*NEO-FFI\_Comp*=True) and the Mini Mental Status Exam (*MMSE\_Comp*=True). All item scores must be available for the NEO-FFI. This left us with  $N = 998$  subjects. **ii) Cognitive compromise.** We excluded one subject with a score of 26 or below on the MMSE, which could indicate marked cognitive impairment in this highly educated sample of adults under age 40 (Crum, Anthony, Bassett, & Folstein, 1993). This left us with  $N = 997$  subjects. **iii) In-scanner motion.** We further excluded subjects with a root-mean-squared frame-to-frame head motion estimate (*Movement\_Relative\_RMS.txt*) exceeding 0.15mm in any of the 4 resting-state runs (threshold similar to (Finn et al., 2015)). This left us with  $N = 880$  subjects. **iv) Outliers on NEO-FFI responses.** To identify subjects who produced unusual or inconsistent NEO-FFI responses, we used a robust outlier detection method (Leys, Klein, Dominicy, & Ley, 2018) in the five-dimensional space spanned by the five personality factors. As per recommendations in (Leys et al., 2018), we used a robust Mahalanobis distance based on the Minimum Covariance

Determinant (with a breakdown point of 0.25), and a threshold based on the chi-square value with 5 degrees of freedom for quantile 99.9. This identified 13 outlier subjects, leaving us with our final sample of 867 subjects (see **Table S1**), including 402 males (age range 22-36).

## Assessment and removal of potential confounds

We computed the correlation of each of the personality factors with Gender (*Gender*), Age (*Age\_in\_Yrs*, restricted), IQ (*PMAT24\_A\_CR*). We also looked for differences in personality in our subject sample with variables that are likely to affect FC matrices, such as brain size (we used *FS\_BrainSeg\_Vol*), motion (we computed the sum of framewise displacement in each run), and the multiband reconstruction algorithm which changed in the third quarter of HCP data collection (*fMRI\_3T\_ReconVrs*). Correlations are shown in **Figure 2a** below. We then used multiple linear regression to regress these variables from each of the personality scores and remove their confounding effects.

Note that we do not control for differences in cortical thickness and other morphometric features, which have been reported to be correlated with personality factors (e.g. (Riccelli et al., 2017)). These likely interact with FC measures and should eventually be accounted for in a full model, yet this was deemed outside the scope of the present study.

We should also note that it turns out that the five personality factors are in fact correlated to some degree (see Results, **Figure 2a**). We did not orthogonalize them-- consequently predictability would be expected also to correlate slightly among personality factors.

## Data preprocessing

Resting-state data must be preprocessed beyond “minimal preprocessing”, due to the presence of multiple noise components, such as subject motion and physiological fluctuations. Several approaches have been proposed to remove these noise components and clean the data, however the community has not yet reached a consensus on the “best” denoising pipeline for resting-state fMRI data (Caballero-Gaudes & Reynolds, 2016; Ciric et al., 2017; Murphy & Fox, 2017; Siegel et al., 2016). Most of the steps taken to denoise resting-state data have limitations, and it is unlikely that there is a set of denoising steps that can completely remove noise without also discarding some of the signal of interest. Categories of denoising operations that have been proposed comprise tissue regression, motion regression, noise component regression, temporal filtering and volume censoring. Each of these categories may be implemented in several ways. There exist several excellent reviews of the pros and cons of various denoising steps (Caballero-Gaudes & Reynolds, 2016; T. T. Liu, 2016; Murphy, Birn, & Bandettini, 2013; J. D. Power et al., 2014).

Here, instead of picking a single denoising strategy combining steps used in the previous literature, we set out to explore three reasonable alternatives, which we refer to as A, B, and C (**Figure 1c**). To easily apply these preprocessing strategies in a single framework, using input data that is either volumetric or surface-based, we developed an in-house, Python-based customizable pipeline (mostly based on open source libraries and frameworks for scientific computing, including SciPy, Numpy, NiLearn, NiPype, Scikit-learn (Abraham et al.,

2014; K. Gorgolewski et al., 2011; K. J. Gorgolewski et al., 2017; Pedregosa et al., 2011; Walt, Colbert, & Varoquaux, 2011)) implementing the most common denoising steps described in previous literature.

**Pipeline A** reproduces as closely as possible the strategy described in (Finn et al., 2015) and consists of seven consecutive steps: 1) the signal at each voxel is z-score normalized; 2) using tissue masks, temporal drifts from cerebrospinal fluid (CSF) and white matter (WM) are removed with third-degree Legendre polynomial regressors; 3) the mean signals of CSF and WM are computed and regressed from gray matter voxels; 4) translational and rotational realignment parameters and their temporal derivatives are used as explanatory variables in motion regression; 5) signals are low-pass filtered with a Gaussian kernel with a standard deviation of 1 TR, i.e. 720ms in the HCP dataset; 6) the temporal drift from gray matter signal is removed using a third-degree Legendre polynomial regressor; 7) global signal regression is performed.

**Pipeline B**, described in (Ciric et al., 2017; Satterthwaite, Wolf, et al., 2013), is composed of four steps in our implementation: 1) normalization at voxel-level is performed by subtracting the mean from each voxel's time series; 2) linear and quadratic trends are removed with polynomial regressors; 3) temporal filtering is performed with a first order Butterworth filter with a passband between 0.01 and 0.08 Hz (after linearly interpolating volumes to be censored, cf. step 4); 4) tissue regression (CSF and WM signals with their derivatives and quadratic terms), motion regression (realignment parameters with their derivatives, quadratic terms and square of derivatives), global signal regression (whole brain signal with derivative and quadratic term), and censoring of volumes with a root-mean-squared (RMS) displacement that exceeded 0.25 mm are combined in a single regression model.

**Pipeline C**, inspired by (Siegel et al., 2016), is implemented as follows: 1) an automated independent component (IC)-based denoising was performed with ICA-FIX (Salimi-Khorshidi et al., 2014). Instead of running ICA-FIX ourselves, we downloaded the FIX-denoised data which is available from the HCP database; 2) voxel signals were demeaned and 3) detrended with a first degree polynomial; 4) CompCor, a PCA-based method proposed by (Behzadi, Restom, Liau, & Liu, 2007) was applied to derive 5 components from CSF and WM signals; these were regressed out of the data, together with gray matter and whole-brain mean signals; volumes with a frame-wise displacement greater than 0.25 mm or a variance of differentiated signal (DVARS) greater than 105% of the run median DVARS were discarded as well; 5) temporal filtering was performed with a first-order Butterworth band-pass filter between 0.01 and 0.08 Hz, after linearly interpolating censored volumes.

## Inter-subject alignment, parcellation, and functional connectivity matrix generation

An important choice in processing fMRI data is how to align subjects in the first place. The most common approach is to warp individual brains to a common volumetric template, typically MNI152. However, cortex is a 2D structure; hence, surface-based algorithms that rely on cortical folding to map individual brains to a template may be a better approach. Yet another

improvement in aligning subjects may come from using functional information alongside anatomical information - this is what the multimodal surface matching (MSM) framework achieves (Robinson et al., 2014). MSM-All aligned data, in which intersubject registration uses individual cortical folding, myelin maps, and resting-state fMRI correlation data, is available for download from the HCP database.

Our prediction analyses below are based on functional connectivity matrices. While voxel- (or vertex-) wise functional connectivity matrices can be derived, their dimensionality is too high compared to the number of examples in the context of a machine-learning based predictive approach. PCA or other dimensionality reduction applied to the voxelwise data can be used, but this often comes at the cost of losing neuroanatomical specificity. Hence, we work with the most common type of data: parcellated data, in which data from many voxels (or vertices) is aggregated anatomically and the signal within a parcel is averaged over its constituent voxels. Choosing a parcellation scheme is the first step in a network analysis of the brain (Sporns, 2013), yet once again there is no consensus on the “best” parcellation. There are two main approaches to defining network nodes in the brain: nodes may be a set of overlapping, weighted masks, e.g. obtained using independent component analysis (ICA) of BOLD fMRI data (S. M. Smith et al., 2013); or a set of discrete, non-overlapping binary masks, also known as a hard parcellation (Glasser et al., 2016; Gordon et al., 2014). We chose to work with a hard parcellation, which we find easier to interpret.

Here we present results based on a classical volumetric alignment, together with a volumetric parcellation of the brain into 268 nodes (Finn et al., 2015; X. Shen, Tokoglu, Papademetris, & Constable, 2013); and, for comparison, results based on MSM-All data, together with a parcellation that was specifically derived from this data (Glasser et al., 2016) (**Figure 1d**).

Timeseries extraction simply consisted in averaging data from voxels (or grayordinates) within each parcel, and matrix generation in pairwise correlating parcel time series (Pearson correlation coefficient). FC matrices were averaged across runs (all averaging used Fisher-z transforms) acquired with left-right and right-left phase encoding in each session, i.e. we derived two FC matrices per subject, one for REST1 (from REST1\_LR and REST1\_RL) and one for REST2 (from REST2\_LR and REST2\_RL).

## Test-retest comparisons

We applied all three denoising pipelines to the data of all subjects. We then compared the functional connectivity (FC) matrices produced by each of these strategies, using several metrics. One metric that we used follows from the connectome fingerprinting work of (Finn et al., 2015), and was recently labeled the identification success rate (ISR) (Noble et al., 2017). Identification of subject S is successful if, out of all subjects' FC matrices derived from REST2, subject S's is the most highly correlated with subject S's FC matrix from REST1 (identification can also be performed from REST2 to REST1; results are very similar). The ISR gives an estimate of the reliability and specificity of the entire FC matrix at the individual subject level, and is influenced both by within-subject test-retest reliability as well as by discriminability amongst all subjects in the sample. Relatedly, it is desirable to have similarities (and

differences) between all subjects be relatively stable across repeated testing sessions. Following an approach introduced in (Geerligs, Rubinov, Cam-Can, & Henson, 2015), we computed the pairwise similarity between subjects separately for session 1 and session 2, constructing a  $N_{\text{subjects}} \times N_{\text{subjects}}$  matrix for each session. We then compared these matrices using a simple Pearson correlation. Finally, we used a metric targeted at behavioral utility, and inspired by (Geerligs, Rubinov, et al., 2015): for each edge (the correlation value between a given pair of brain parcels) in the FC matrix, we computed its correlation with a stable trait across subjects, and built a matrix representing the relationship of each edge to this trait, separately for session 1 and session 2. We then compared these matrices using a simple Pearson correlation. The more edges reliably correlate with the stable trait, the higher the correlation between session 1 and session 2 matrices. It should be noted that trait stability is an untested assumption with this approach, because in fact only a single trait score was available in the HCP, collected at the time of session 2. We performed this analysis for the measure of IQ available in the HCP (*PMAT24\_A\_CR*) as well as all Big Five personality factors and the two superordinate factors.

## Prediction models

There is no obvious “best” model available to predict individual behavioral measures from functional connectivity data (Abraham et al., 2016). So far, most attempts have relied on linear machine learning approaches. This is partly related to the well-known “curse of dimensionality”: despite the relatively large sample size that is available to us ( $N=867$  subjects), it is still about an order of magnitude smaller than the typical number of features included in the predictive model. In such situations, fitting relatively simple linear models is less prone to overfitting than fitting complex nonlinear models.

There are several choices of linear prediction models. Here, we present the results of two methods that have been used in the literature for similar purposes: **1**) a simple, “univariate” regression model as used in (Finn et al., 2015), and further advocated by (Xilin Shen et al., 2017), preceded by feature selection; and **2**) a regularized linear regression approach, based on elastic-net penalization (Zou & Hastie, 2005). We describe each of these in more detail next.

**Model (1)** is the simplest model, and the one proposed by (Finn et al., 2015), consisting in a univariate regressor where the dependent variable is the score to be predicted and the explanatory variable is a scalar value that summarizes the functional connectivity network strength (i.e., the sum of edge weights). A simple filtering approach is used to select features (edges in the FC correlation matrix) that are correlated with the behavioral score on the training set: edges that correlate with the behavioral score with a p-value less than 0.01 are kept. Two distinct models are built using edges of the network that are positively and negatively correlated with the score, respectively. This method has the advantage of being extremely fast to compute, but some main limitations are that i) it condenses all the information contained in the connectivity network in a single measure and does not account for any interactions between edges and ii) it arbitrarily builds two separate models (one for positively correlated edges, one for negatively correlated edges; they are referred to as the positive and the negative models

(Finn et al., 2015)) and does not offer a way to integrate them. We only report results from the positive model here.

To address the limitations of the univariate model, we also included a multivariate model. **Model (2)** kept the same filtering approach as for the univariate model (discard edges for which the p-value of the correlation with the behavioral score is greater than 0.01); this choice allows for a better comparison of the multivariate and univariate models, and for faster computation. Elastic Net is a regularized regression method that linearly combines L1- (lasso) and L2- (ridge) penalties to shrink some of the regressor coefficients toward zero, thus retaining just a subset of features. The lasso model performs continuous shrinkage and automatic variable selection simultaneously, but in the presence of a group of highly correlated features, it tends to arbitrarily select one feature from the group. With high-dimensional data and few examples, the ridge model has been shown to outperform lasso; yet it cannot produce a sparse model since all the predictors are retained. Combining the two approaches, elastic net is able to do variable selection and coefficient shrinkage while retaining groups of correlated variables. Here however, based on preliminary experiments and on the fact that it is unlikely that just a few edges contribute to prediction, we fixed the L1 ratio (which weights the L1- and L2- regularizations) to 0.01, which amounts to almost pure ridge regression. We used 3-fold nested cross-validation (with balanced “classes”, based on a partitioning of the training data into quartiles) to choose the alpha parameter (among 50 possible values) that weighs the penalty term.

## Cross-validation scheme

In the HCP dataset, several subjects are genetically related (in our final subject sample, there were 408 unique families). To avoid biasing the results due to this family structure (e.g., perhaps having a sibling in the training set would facilitate prediction for a test subject), we implemented a leave-one-family-out cross-validation scheme for all predictive analyses.

## Statistical assessment of predictions

The outcome measure for our predictions is simply the correlation between true scores and predicted scores (which, squared, can be interpreted as the fraction of variance explained by our predictive model).

In a cross-validation scheme, the folds are not independent of each other. This means that statistical assessment of the cross-validated performance using parametric statistical tests is problematic (Combrisson & Jerbi, 2015; Noirhomme et al., 2014). Proper statistical assessment should thus be done using permutation testing on the actual data. To establish the empirical distribution of chance, we ran our predictive analysis using 1000 random permutations of the scores (shuffling scores randomly between subjects, keeping everything else exactly the same, including the family structure). Permutation testing can be computationally prohibitive in the case of complex models; we found it to be very CPU-time-consuming with the two simple models presented here. Due to the computational demands, we only performed permutation testing for (some of the) analyses that passed the parametric significance threshold, so as to assign these results more accurate p-values.

## Visualization of edges and nodes participating in predictions

To gain an initial understanding of the neural correlates of the individual scores which were successfully predicted, we visualized the nodes participating in our predictive models. We first selected edges that were correlated with the (de-confounded) scores, with a threshold  $p < 0.01$  as in our feature selection step, in at least one of the cross-validation folds. We then kept only the edges that appeared in both sessions (test-retest reliability) and in all three preprocessing strategies (conceptually equivalent to inter-rater reliability). We finally computed the degree of each node, as the percentage of the maximum number of edges that included that node (with the maximum being the number of parcels minus one). Therefore, a high value for a node means that a high number of connections to that node enter our predictive models. Note that this visualization does not separately consider positive and negative relationships between edge strength and the behavioral score. It is also not obviously related to the importance of the node itself for prediction, which would require further work such as selectively pruning edges to assess the loss of prediction; this was outside the scope of the present study.

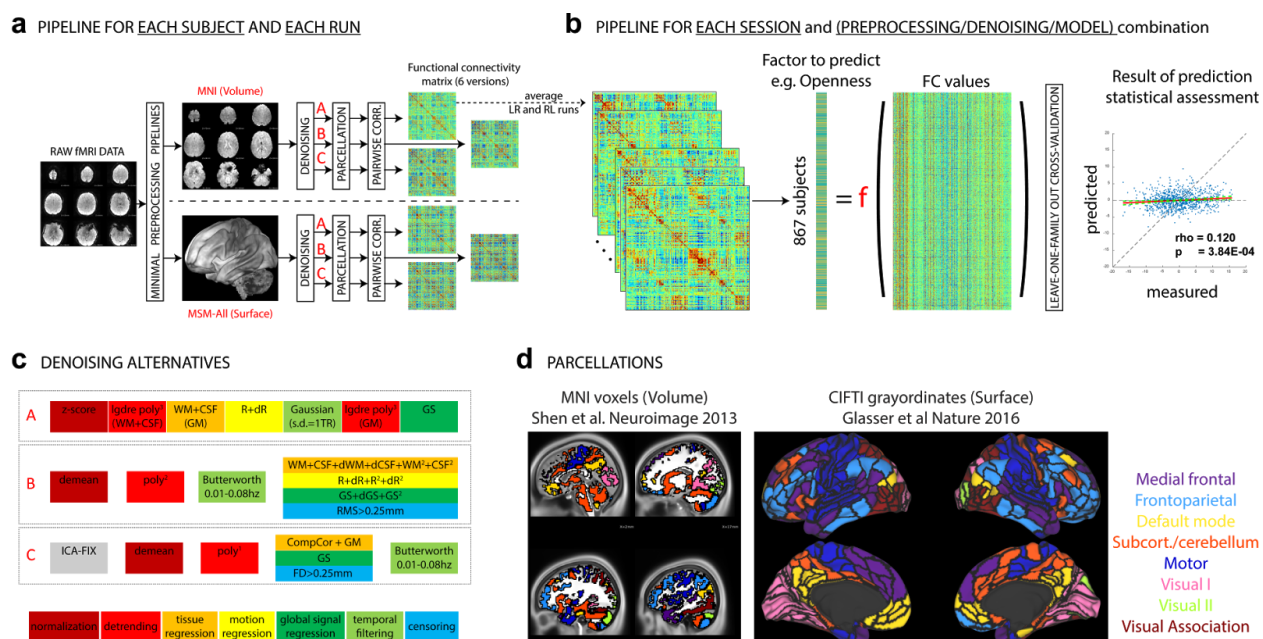

**Figure 1. Overview of our approach.** In total, we separately analyzed 24 different sets of results: 2 data sessions x 2 alignment/brain parcellation schemes x 3 preprocessing pipelines x 2 predictive models. **a.** The data from each selected HCP subject ( $N_{\text{subjects}}=867$ ) and each run (REST1\_LR, REST1\_RL, REST2\_LR, REST2\_RL) was downloaded after minimal preprocessing, both in MNI space, and in MSM-All space. The \_LR and \_RL runs within each session were averaged, producing 2 datasets that we call REST1 and REST2 henceforth. Data for REST1 and REST2, and for both spaces (MNI, MSM-All) were analyzed separately. We

applied three alternate denoising pipelines to remove typical confounds found in resting-state fMRI data (see **c**). We then parcellated the data (see **d**) and built a functional connectivity matrix separately for each alternative. This yielded 6 FC matrices per run and per subject. In red: alternatives taken and presented in this paper. **b**. For each of the 6 alternatives, an average FC matrix was computed for REST1 (from REST1\_LR and REST1\_RL) and for REST2 (from REST2\_LR and REST2\_RL). For a given session, we built a ( $N_{\text{subjects}} \times N_{\text{edges}}$ ) matrix, stacking the upper triangular part of all subjects' FC matrices (the lower triangular part is discarded, because FC matrices are diagonally symmetric). Each column thus corresponds to a single entry in the upper triangle of the FC matrix (a pairwise correlation between two brain parcels, or edge) across all 867 subjects. There are a total of  $N_{\text{parcels}}(N_{\text{parcels}} - 1)/2$  edges (thus: 35778 edges for the MNI parcellation, 64620 edges for the MSM-All parcellation). This was the data from which we then predicted individual differences in each of the personality factors. We used two different linear models (see text), and a leave-one-family-out cross validation scheme. The final result is a predicted score for each subject, which is correlated against the measured score for statistical assessment of the prediction. **c**. Detail of the three denoising alternatives. These are reasonable, published denoising strategies for resting-state fMRI. The steps are color-coded to indicate the category of operation they correspond to (legend at the bottom). See text for details. **d**. The parcellations used for the MNI-space and MSM-All space, respectively. Major resting-state networks are color-coded for visualization, following labels in (Finn et al., 2015).

## Results

### Characterization of behavioral measures

#### Internal consistency, distribution, and inter-correlations of personality traits

In our final subject sample ( $N=867$ ), there was good internal consistency for each personality trait, as measured with Cronbach's  $\alpha$ . We found: Openness,  $\alpha = 0.755$ ; Conscientiousness  $\alpha = 0.805$ ; Extraversion,  $\alpha = 0.778$ ; Agreeableness,  $\alpha = 0.742$ ; and Neuroticism,  $\alpha = 0.841$ . These compare well with the values reported by (Robert R. McCrae & Costa, 2004).

Scores on all factors were nearly normally distributed by visual inspection, although the null hypothesis of a normal distribution was rejected for all but Agreeableness (using D'Agostino and Pearson's (D'Agostino & Pearson, 1973) normality test as implemented in SciPy) (**Figure 2b**).

Although in theory the Big Five personality traits should be orthogonal, their estimation from the particular item scoring of versions of the NEO in practice deviates considerably from orthogonality. This intercorrelation amongst the five factors has been reported for the NEO-PI-R (Block, 1995; Saucier, 2002), the NEO-FFI (Block, 1995; Egan, Deary, & Austin, 2000), and alternate instruments (DeYoung, 2006) (but, see (Robert R. McCrae et al., 2008)). Indeed, in



our subject sample, we found that the five personality factors were correlated with one another (**Figure 2a**). For example, Neuroticism was anticorrelated with Conscientiousness ( $r = -0.413$ ,  $p < 10^{-35}$ ), Extraversion ( $r = -0.350$ ,  $p < 10^{-25}$ ), and Agreeableness ( $r = -0.307$ ,  $p < 10^{-19}$ ), while these latter three factors were positively correlated with one another (all  $r > 0.24$ ). Following others, we thus derived two superordinate factors that incorporate this correlation structure: we performed a factor analysis of the 60 item scores in our subject sample, with varimax rotation (5 factorial iterations, 11 rotational iterations). We labeled the two derived dimensions  $\alpha$  and  $\beta$ , following (Digman, 1997). Essentially the same two factors were obtained from a factor analysis of the Big Five scores rather than from the raw 60 items (data not shown). **Figure 2c** shows how the Big Five project on this two-dimensional solution. We carried out further analyses on all 7 factors: the Big Five, and the two superordinate factors.

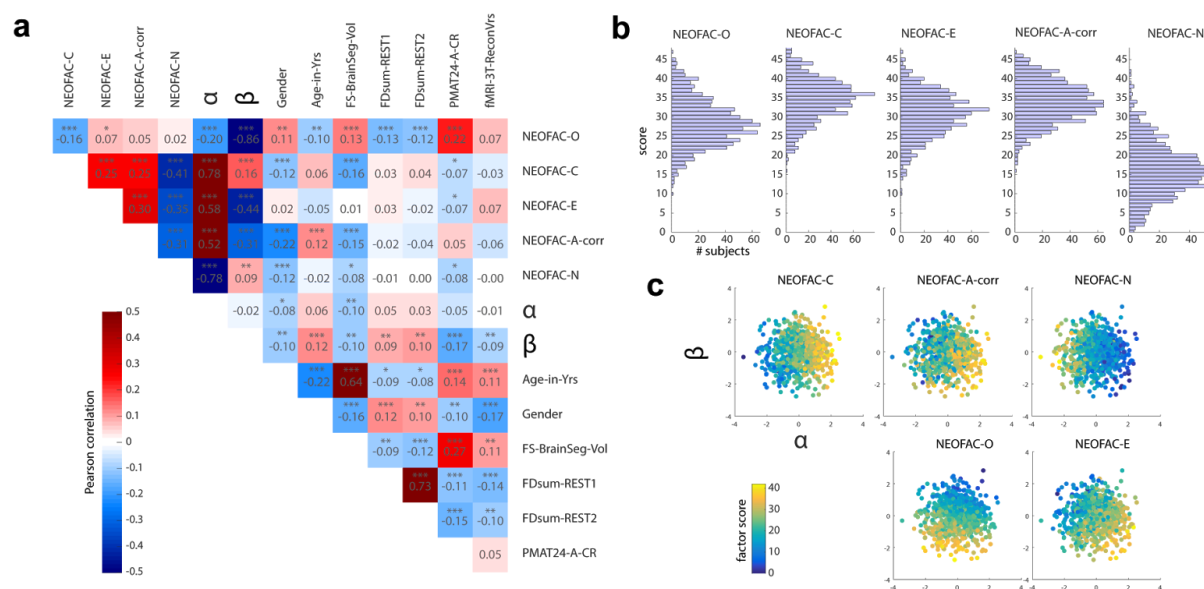

**Figure 2. Structure of Personality factors in our subject sample (N=867).** **a.** The five personality factors were not orthogonal in our sample. Neuroticism was anticorrelated with Conscientiousness, Extraversion and Agreeableness, and the latter three were positively correlated with each other. Openness correlated more weakly with other factors. There were highly significant correlations with other behavioral and demographic variables, which we accounted for in our subsequent analyses by regressing them out of the personality scores (see next section). **b.** Distributions of the five personality scores in our sample. Each of the five personality scores was approximately normally distributed by visual inspection. **c.** Factor analysis with varimax rotation on the 60 item scores, projecting the data on two superordinate dimensions,  $\alpha$  and  $\beta$ .

## Confounding variables

There are known effects of gender (Ruigrok et al., 2014; Trabzuni et al., 2013), age (Dosenbach et al., 2010; Geerligs, Renken, Saliassi, Maurits, & Lorist, 2015), in-scanner motion (J. D. Power, Barnes, Snyder, Schlaggar, & Petersen, 2012; Satterthwaite, Elliott, et al., 2013;

Tyszka, Kennedy, Paul, & Adolphs, 2014), brain size (Hänggi, Fövényi, Liem, Meyer, & Jäncke, 2014) and IQ (Cole, Yarkoni, Repovs, Anticevic, & Braver, 2012; Finn et al., 2015; Noble et al., 2017) on the functional connectivity patterns measured in the resting-state with fMRI. It is thus necessary to control for these variables: indeed, if a personality factor is correlated with gender, one would be able to predict some of the variance in that personality factor solely from functional connections that are related to gender. The easiest way to control for these confounds is to remove any relationship between the confounding variables and the score of interest in our sample of subjects, which can be done using multiple regression.

We characterized the relationship between each of the personality factors and each of the confounding variables listed above in our subject sample (**Figure 2a**). All personality factors but Extraversion were correlated with gender: women scored higher on Conscientiousness, Agreeableness and Neuroticism, while men scored higher on Openness. In previous literature, women have been reliably found to score higher on Neuroticism and Agreeableness, which we replicated here, while other gender differences are generally inconsistent at the level of the factors (Paul T. Costa, Terracciano, & McCrae, 2001; Feingold, 1994; Weisberg, Deyoung, & Hirsh, 2011). Agreeableness and Openness were significantly correlated with age in our sample, despite our limited age range (22-36 y.o.): younger subjects scored higher on Openness, while older subjects scored higher on Agreeableness. The finding for Openness does not match previous reports (Allemand, Zimprich, & Hendriks, 2008; Soto, John, Gosling, & Potter, 2011), but this may be confounded by other factors such as gender, as our analyses here do not use partial correlations. Motion, quantified as the sum of frame-to-frame displacement over the course of a run (and averaged separately for REST1 and REST2) was correlated with Openness: subjects scoring lower on Openness moved more during the resting-state. Note that motion in REST1 was highly correlated ( $r=0.724$ ,  $p<10^{-138}$ ) with motion in REST2, indicating that motion itself may be a stable trait, and correlated with other traits. Brain size, obtained from Freesurfer during the minimal preprocessing pipelines, was found to be significantly correlated with all personality factors but Extraversion. IQ was positively correlated with Openness, and negatively correlated with Conscientiousness, Extraversion, and Neuroticism, consistent with other reports (Bartels et al., 2012; Chamorro-Premuzic & Furnham, 2004). While the interpretation of these complex relationships would require further work outside the scope of this study, we felt that it was critical to remove shared variance between each personality score and the primary confounding variables before proceeding further. This ensures that our model is trained specifically to predict personality, rather than confounds that covary with personality.

Another possible confound, specific to the HCP dataset, is a difference in the image reconstruction algorithm between subjects collected prior to and after April 2013. The reconstruction version leaves a notable signature on the data that can make a large difference in the final analyses produced (Elam, 2015). We found a significant correlation with the Openness factor in our sample. Therefore, we also included the reconstruction factor as a confound variable.

Importantly, the multiple linear regression used for removing the variance shared with confounds was performed on training data only (in each cross-validation fold during the prediction analysis), and then the fitted weights were applied to both the training and test data.

This is critical to avoid any leakage of information, however negligible, from the test data into the training data.

Authors of the HCP-MegaTrawl have used transformed variables (Age<sup>2</sup>) and interaction terms (Gender x Age, Gender x Age<sup>2</sup>) as further confounds (S. Smith et al., 2016). After accounting for the confounds described above, we did not find sizeable correlations with these additional terms (all correlations <0.009), and thus we did not use these additional terms in our confound regression.

## Preprocessing affects test-retest reliability of FC matrices

As we are interested in relatively stable traits (which are unlikely to change much between sessions REST1 and REST2), one clear goal for the denoising steps applied to the minimally preprocessed data is to yield functional connectivity matrices that are as “similar” as possible across the two sessions. We computed several metrics (see Methods) to assess this similarity for each of our three denoising strategies (A, B, and C; cf **Figure 1c**).

In general, differences in test-retest reliability across metrics were small when comparing the three denoising strategies. Considering the entire FC matrix, the Identification Success Rate (ISR) (Finn et al., 2015; Noble et al., 2017) was high for all strategies, and highest for pipeline B (**Figure 3a**). The multivariate pairwise distances between subjects were also best reproduced across sessions by pipeline B (**Figure 3b**). In terms of behavioral utility, i.e. reproducing the pattern of correlations of the different edges with a behavioral score, pipeline A outperformed the others (**Figure 3c**). All three strategies appear to be reasonable choices, and we would thus expect a similar predictive accuracy under each of them, if there is information about a given score in the functional connectivity matrix.

We note here already that Neuroticism stands out as having lower test-retest reliability in terms of its relationship to edge values across subjects (**Figure 3c**). This may be a hint that the FC matrices do not carry information about Neuroticism.

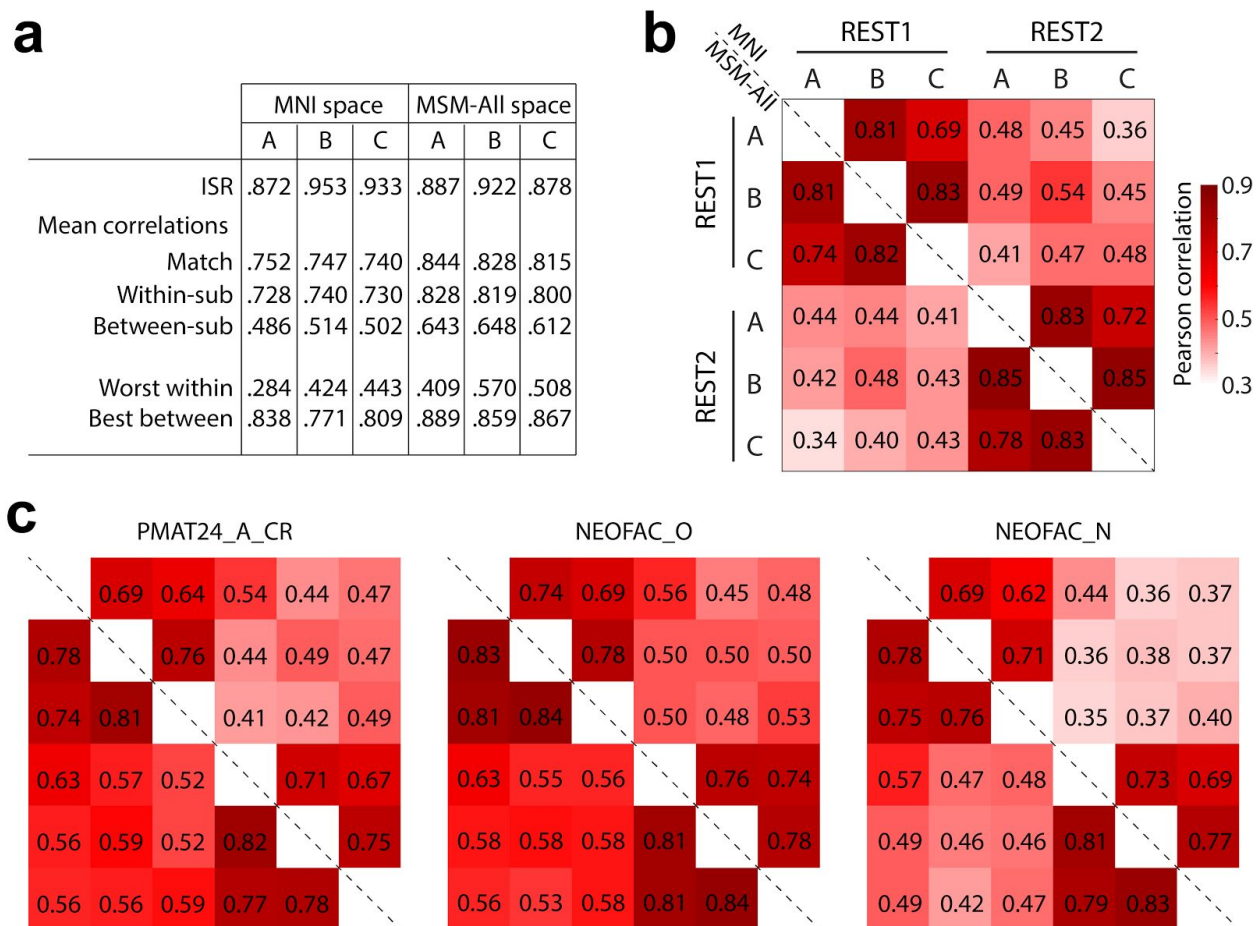

**Figure 3. Test-retest comparisons between spaces and denoising strategies.** **a.** Identification success rate, and other statistics related to connectome fingerprinting (Finn et al., 2015; Noble et al., 2017). All pipelines had a success rate superior to 87% for identifying the functional connectivity matrix of a subject in REST2 (out of N=867 choices) based on their functional connectivity matrix in REST1. Pipeline B slightly outperformed the others. **b.** Test-retest of the pairwise similarities (based on Pearson correlation) between all subjects (Geerligs, Rubinov, et al., 2015). Overall, for the same session, the three pipelines give similar pairwise similarities between subjects. About 25% of the variance in pairwise distances is reproduced in REST2, with pipeline B emerging as the winner. **c.** Test-retest reliability of behavioral utility, quantified as the pattern of correlations between each edge and a behavioral score of interest (Geerligs, Rubinov, et al., 2015). Shown are IQ, Openness, and Neuroticism (all de-confounded, see main text). Pipeline A gives slightly better test-retest reliability for all behavioral scores. MSM-All outperforms MNI alignment. Neuroticism shows poorer test-retest than IQ and Openness.

## Prediction of IQ (*PMAT24\_A\_CR*)

It has been reported that a measure of IQ, the raw score on a 24-item version of the Raven's Progressive Matrices (*PMAT24\_A\_CR*), could be predicted from FC matrices in

previous releases of the HCP dataset (Finn et al., 2015; Noble et al., 2017). Here we generally replicate this result for the de-confounded IQ score (removing variance shared with gender, age, brain size, motion, and reconstruction version), using a leave-one-family-out cross-validation approach. We found positive correlations across all 24 of our result datasets: 2 sessions x 3 denoising pipelines (A, B & C) x 2 parcellation schemes (in volumetric space and in MSM-All space) x 2 models (univariate (positive) and multivariate learning models) (**Figure 4a**). The mean effect size across all 12 alternative analyses was  $r=.147$  for REST1, and  $r=.123$  for REST2 (see **Table 1**). We note however that, using MNI space and denoising strategy A as in (Finn et al., 2015), the prediction is barely significant in REST1 (at parametric  $p<0.05$ ), and not significant in REST2. One difference is that the previous study did not use de-confounding, hence some variance from confounds may have been used in the predictions; also the sample size was much smaller in (Finn et al., 2015) ( $N=118$ ; but  $N=606$  in (Noble et al., 2017)), and family structure was not accounted for in the cross-validation. Performance is better, and reliable across sessions and pipelines, in MSM-All space (**Table 1**).

For the prediction using pipeline A, we estimated the distribution of chance for the prediction score under both the univariate and the multivariate models, in volumetric and in MSM-All space, using 1000 random permutations of the subjects' IQ scores (**Figure 4b**). It can be seen that parametric statistics underestimate the confidence interval for the null hypothesis, hence overestimate significance. Interestingly, the null distributions differ between the univariate and the multivariate models: while the distribution under the multivariate model is roughly symmetrical around 0, the distribution under the univariate model is asymmetrical with a long tail on the left. The empirical, one-tailed p-value for REST1 MNI space data denoised with strategy A and using the univariate positive model is  $p=0.063$ , while the parametric one-tailed p-value is  $p=0.005$ . Hence using non-parametric statistics, de-confounded IQ is not predicted above chance in MNI space with strategy A and the univariate positive model. This analysis clearly evidences the “optimism” of parametric significance thresholds for cross-validated prediction analyses, and further shows that the specific model used for prediction can affect statistical thresholds. The empirical p-value for REST1 MSM-All data denoised with strategy A and using the multivariate model is  $p=0.001$  (none of the 1000 random permutations resulted in a higher prediction score).

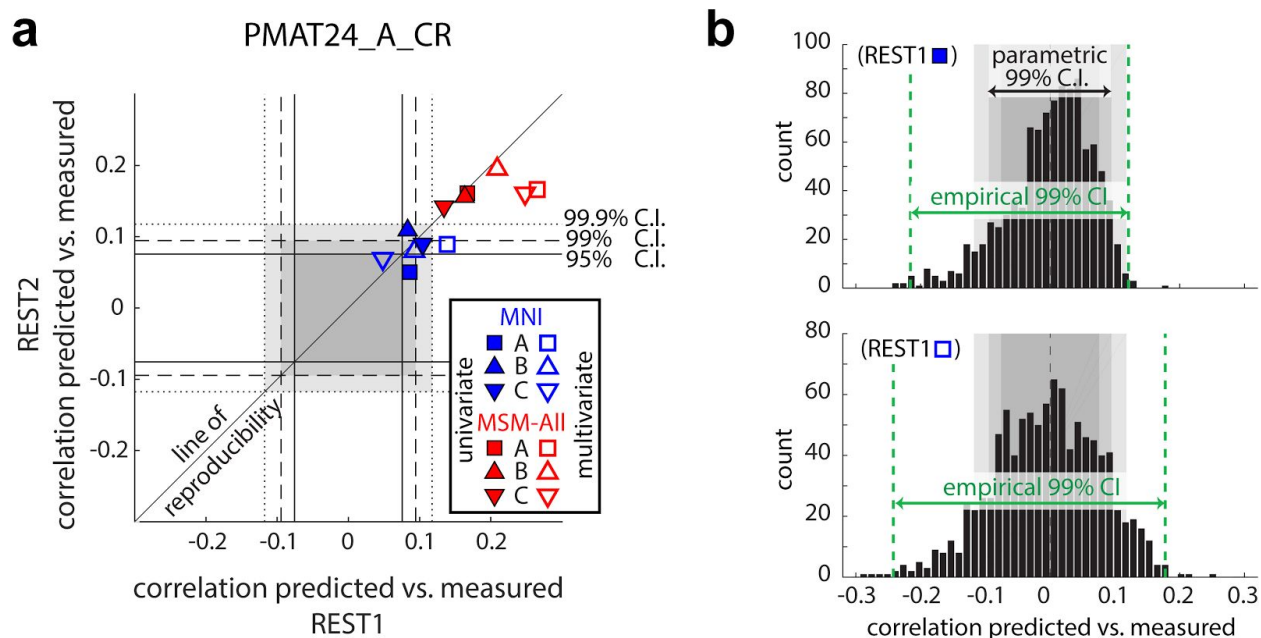

**Figure 4. Prediction results for de-confounded IQ (*PMAT24\_A\_CR*).** **a.** All predictions are assessed using the correlation between the predicted score and the measured score (the actual score of the subject). The prediction score in REST2 is plotted against the prediction score in REST1, to assess test-retest reliability of the results. Parametric confidence intervals (95%, 99% and 99.9%) for the null hypothesis are shown as shades of gray. Results in MSM-All space outperform results in MNI space, and are reliable across REST1 and REST2. The multivariate model slightly outperforms the univariate (positive) model. Our results generally show good test-retest reliability across sessions. See also **Table 1**. Parametric significance thresholds are shown solely for visualization purposes, and cannot be used for statistical assessment. **b.** We ran the prediction (REST1, MNI space, strategy A) 1000 times, randomly shuffling the IQ scores while keeping everything else the same, for the univariate model (top) and the multivariate model (bottom). The distribution of prediction scores under the null hypothesis is shown (black histogram). Note that the empirical 99% confidence interval is wider than the parametric CI used in **a**, and features a heavy tail on the left side for the univariate model. This demonstrates clearly that parametric statistics are not appropriate in the context of cross-validation. Such permutation testing may be computationally prohibitive for more complex models, yet since the chance distribution is model-dependent, it must be performed for statistical assessment.

|                 |              |              | PMAT24_A_CR |       | NEOFAC_O |        | NEOFAC_C |        | NEOFAC_E |        | NEOFAC_A_corr |        | NEOFAC_N |        | Alpha  |        | Beta  |        |
|-----------------|--------------|--------------|-------------|-------|----------|--------|----------|--------|----------|--------|---------------|--------|----------|--------|--------|--------|-------|--------|
|                 |              |              | REST1       | REST2 | REST1    | REST2  | REST1    | REST2  | REST1    | REST2  | REST1         | REST2  | REST1    | REST2  | REST1  | REST2  | REST1 | REST2  |
| MNI             | A            | univariate   | 0.086       | 0.050 | 0.053    | 0.096  | 0.078    | 0.068  | 0.068    | 0.097  | 0.035         | 0.075  | -0.005   | 0.065  | 0.015  | 0.052  | 0.105 | 0.106  |
|                 |              | multivariate | 0.139       | 0.089 | 0.057    | 0.140  | 0.002    | 0.024  | 0.040    | 0.055  | 0.005         | 0.114  | 0.032    | 0.040  | -0.140 | 0.097  | 0.071 | -0.018 |
|                 | B            | univariate   | 0.083       | 0.109 | 0.100    | 0.120  | -0.154   | 0.037  | 0.031    | 0.103  | -0.082        | 0.067  | 0.015    | -0.003 | 0.047  | 0.086  | 0.090 | 0.118  |
|                 |              | multivariate | 0.093       | 0.080 | 0.107    | 0.080  | -0.141   | 0.102  | 0.129    | 0.024  | -0.111        | 0.009  | -0.009   | -0.008 | 0.101  | 0.156  | 0.130 | 0.099  |
|                 | C            | univariate   | 0.105       | 0.090 | 0.119    | 0.015  | -0.094   | 0.035  | 0.084    | 0.103  | 0.040         | 0.108  | -0.033   | -0.019 | -0.048 | -0.007 | 0.078 | 0.124  |
|                 |              | multivariate | 0.048       | 0.069 | 0.182    | 0.139  | -0.128   | -0.039 | 0.103    | 0.026  | -0.079        | 0.054  | 0.015    | 0.081  | -0.066 | 0.044  | 0.095 | 0.085  |
| MSM-All         | A            | univariate   | 0.167       | 0.161 | 0.120    | 0.159  | 0.057    | 0.071  | 0.083    | 0.097  | 0.041         | 0.081  | -0.004   | 0.059  | 0.045  | 0.059  | 0.124 | 0.157  |
|                 |              | multivariate | 0.265       | 0.166 | 0.141    | 0.192  | 0.157    | 0.034  | 0.051    | 0.121  | -0.038        | -0.017 | 0.011    | 0.015  | 0.106  | 0.106  | 0.173 | 0.197  |
|                 | B            | univariate   | 0.164       | 0.156 | 0.114    | 0.101  | 0.047    | 0.043  | 0.062    | 0.091  | 0.074         | 0.081  | 0.023    | 0.075  | -0.048 | 0.081  | 0.115 | 0.146  |
|                 |              | multivariate | 0.209       | 0.195 | 0.203    | 0.128  | -0.001   | 0.089  | 0.034    | 0.079  | 0.028         | 0.066  | -0.122   | 0.009  | 0.075  | 0.170  | 0.164 | 0.122  |
|                 | C            | univariate   | 0.134       | 0.142 | 0.081    | 0.088  | 0.084    | 0.040  | 0.071    | 0.080  | 0.061         | 0.093  | 0.021    | 0.068  | 0.083  | 0.086  | 0.118 | 0.130  |
|                 |              | multivariate | 0.248       | 0.161 | 0.065    | 0.114  | 0.082    | 0.145  | 0.129    | 0.182  | 0.036         | 0.059  | 0.031    | 0.093  | 0.158  | 0.126  | 0.124 | 0.215  |
| MNI             | average      | univariate   | 0.091       | 0.083 | 0.091    | 0.077  | -0.057   | 0.047  | 0.061    | 0.101  | -0.002        | 0.083  | -0.008   | 0.014  | 0.005  | 0.044  | 0.091 | 0.116  |
|                 | multivariate | 0.093        | 0.079       | 0.116 | 0.120    | -0.089 | 0.029    | 0.091  | 0.035    | -0.062 | 0.059         | 0.013  | 0.038    | -0.035 | 0.099  | 0.099  | 0.055 |        |
| MSM-All         | average      | univariate   | 0.155       | 0.153 | 0.105    | 0.116  | 0.063    | 0.051  | 0.072    | 0.089  | 0.059         | 0.085  | 0.013    | 0.067  | 0.075  | 0.119  | 0.144 |        |
|                 | multivariate | 0.241        | 0.174       | 0.137 | 0.145    | 0.080  | 0.090    | 0.071  | 0.128    | 0.009  | 0.036         | -0.027 | 0.039    | 0.113  | 0.134  | 0.154  | 0.178 |        |
| Overall average |              |              | 0.147       | 0.123 | 0.113    | 0.115  | -0.001   | 0.054  | 0.074    | 0.089  | 0.001         | 0.066  | -0.002   | 0.040  | 0.027  | 0.088  | 0.116 | 0.124  |
|                 |              |              | 0.134       |       | 0.113    |        | 0.027    |        | 0.081    |        | 0.033         |        | 0.019    |        | 0.058  |        | 0.120 |        |

**Table 1. Predictions results** (Pearson correlation coefficient between predicted and observed individual scores) for all behavioral scores and analytical alternatives, for both sessions (two columns for each score). Averages use a Fisher-z transform. The average statistics are provided for descriptive purposes only. For reference, parametric confidence intervals given  $N=867$  are  $\text{abs}(r)<0.0755$  (95%),  $\text{abs}(r)<0.0945$  (99%) and  $\text{abs}(r)<0.1176$  (99.9%); however, these underestimate the true confidence intervals that would be obtained from permutation tests (see **Figure 4b**).

## Prediction of the Big Five and superordinate personality factors

Having established that our approach reproduces and improves on an existing finding (Finn et al., 2015; Noble et al., 2017), we next turned to predicting each of the de-confounded Big Five personality factors using the same approach (de-confounding removed variance shared with gender, age, brain size, motion, reconstruction version, and importantly, IQ). The results are shown in **Figure 5a**.

Several observations can be made from these results. Most broadly, predictability was quite poor. There is a hint that the MSM-All parcellation did better overall (red symbols are more positive than blue symbols), and REST2 produced overall better predictability than REST1 (results fall mostly to the left of the diagonal line of reproducibility). The latter finding is interesting, since the NEO-FFI test was also administered closer in time to REST2 than to REST1 on average. For Conscientiousness, Agreeableness, and Neuroticism, as well as the superordinate factor derived primarily from these ( $\alpha$ ; top row in **Figure 5a,b**), predictability was not significant overall (all  $r<0.07$ , see **Table 1**). As well, the performance of our different analysis alternatives varied considerably, and in some cases actually produced negative correlations (that is, predicted slightly in the wrong direction), a clear sign of unreliability. Whether these findings reflect true unpredictability, or merely show high sensitivity to the details of the processing, will remain to be seen. Openness and Extraversion, as well as their corresponding superordinate factor ( $\beta$ ) showed considerably better predictability (mean correlations of  $r=0.11$ ,  $r=0.08$  and  $r=0.12$ , respectively; see **Table 1**). The best values were once again obtained for REST2 and for the MSM-All parcellation with the multivariate model (y-axis value for the open red symbols), and approached  $r=0.2$  in the best cases. The empirical p-value for the prediction of superordinate factor  $\beta$  in REST2, MSM-All data with denoising A was  $p=0.003$  (for comparison, given a prediction score  $r=0.197$ , the parametric p-value is 2.46 x

$10^{-9}$ ; this again demonstrates the importance of using permutation testing for statistical assessment).

Although we conducted 12 different analyses for each session with the intent to present all of them in an unbiased manner, it is nonetheless notable that certain combinations produced the best predictions across different personality scores. Furthermore, these are some of the same combinations that yielded the best predictability for IQ (**Figure 4**, above). Specifically, the MSM-All brain parcellation, and the multivariate model (elastic net) produced the best predictions. We would thus summarize these results as showing three main points.

First, there is variability across sessions and analysis alternatives, demonstrating the sensitivity that prediction of individual differences in personality has with respect to exactly how the data are processed. This puts a high priority on trying several processing pipelines, as we did here, and a priority on very complete documentation of what was done so that other investigators can replicate findings. Eventually, the results from the best analysis pipeline would need to be replicated independently, ideally in a pre-registered study. Note that we did not Bonferroni correct for all the different analyses, nor for the multiple personality traits that we investigated.

Second, in general Conscientiousness, Agreeableness, and Neuroticism cannot be predicted; whereas Openness and Extraversion can be weakly predicted. Whether or not the predictability of Openness and Extraversion is a reproducible finding will require further replications, and more comprehensive statistical evaluation using permutation tests.

Third, while the findings strongly encourage additional processing alternatives, some of which may produce results yet superior to those here, we can provisionally recommend the multimodal brain parcellation (Glasser et al., 2016) together with multivariate models such as elastic net regression. We comment further on these recommendations in the Discussion.

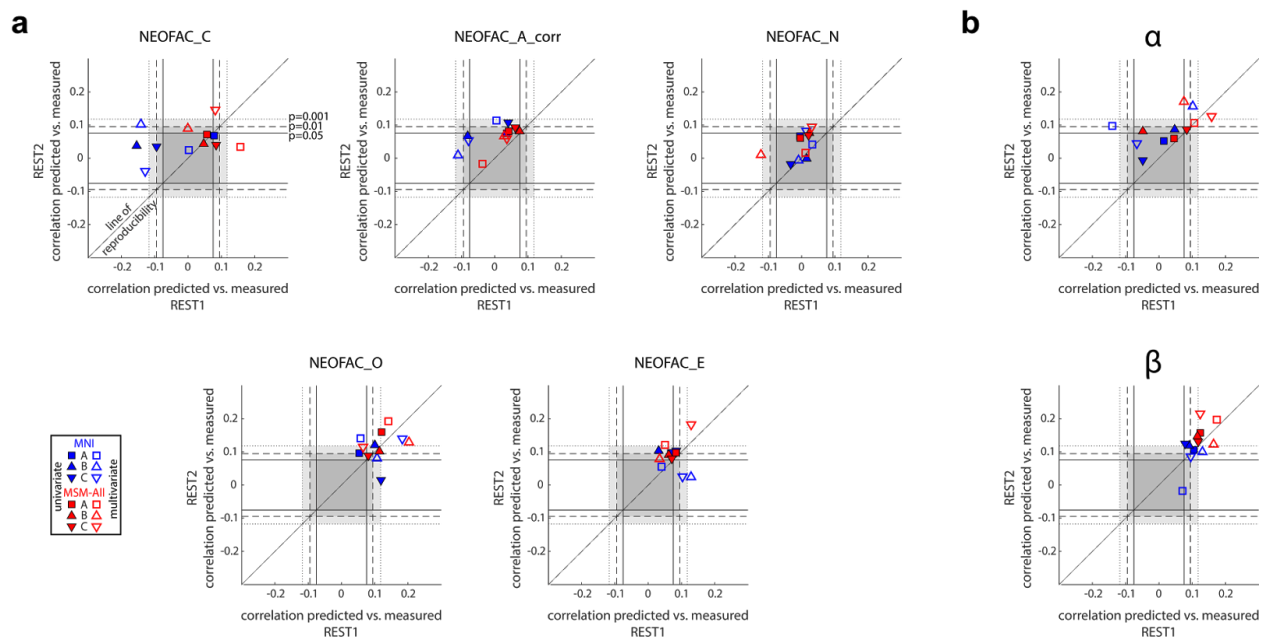

**Figure 5. Prediction results for the Big Five and superordinate personality factors. a.** Prediction results for each of the Big Five. Representation is the same as in **Figure 4a**. The only



factor that shows consistency across spaces, denoising strategies, models and sessions is Openness (*NEOFAC\_O*), although Extraversion (*NEOFAC\_E*) also shows uniformly positive correlations. **b.** Prediction results for superordinate factors  $\alpha$  and  $\beta$ . The prediction for  $\beta$  is also very consistent across the various alternatives, especially in MSM-All space. See also **Table 1**. Parametric significance thresholds are shown solely for visualization purposes, as they likely underestimate the true confidence interval (cf. **Figure 4b**).

## Visualization of nodes reliably participating in the prediction of superordinate factor $\beta$

Having established predictability above chance for the  $\beta$  scores (keeping in mind the possible optimism of parametric statistical thresholds in the context of a cross-validation scheme, see **Figure 4b**), we next investigated which network nodes most contributed to the successful predictions. Since only superordinate personality factor  $\beta$  could be predicted with confidence (**Figure 5b**), we focused on the neuroanatomy of this prediction, and compared it with the neuroanatomy of the successful prediction of IQ (**Figure 4a**). Since any correlation with IQ was removed from  $\beta$  scores in our subject sample using multiple linear regression (see Methods), the prediction of  $\beta$  necessarily relies on different functional connectivity substrates. Indeed we found that there was no overlap between edges reliably selected (across sessions and denoising strategies) to predict IQ and  $\beta$ . However, we found that there was substantial overlap in the nodes (brain parcels) that have the largest numbers of predictive edges. The anatomical distribution of these nodes is shown in Figure 6 and reveals a very distributed set of regions over most of the brain. To further test for the importance of each node and edge for prediction, further analyses using recursive feature elimination would be needed, which were outside the scope of this study.

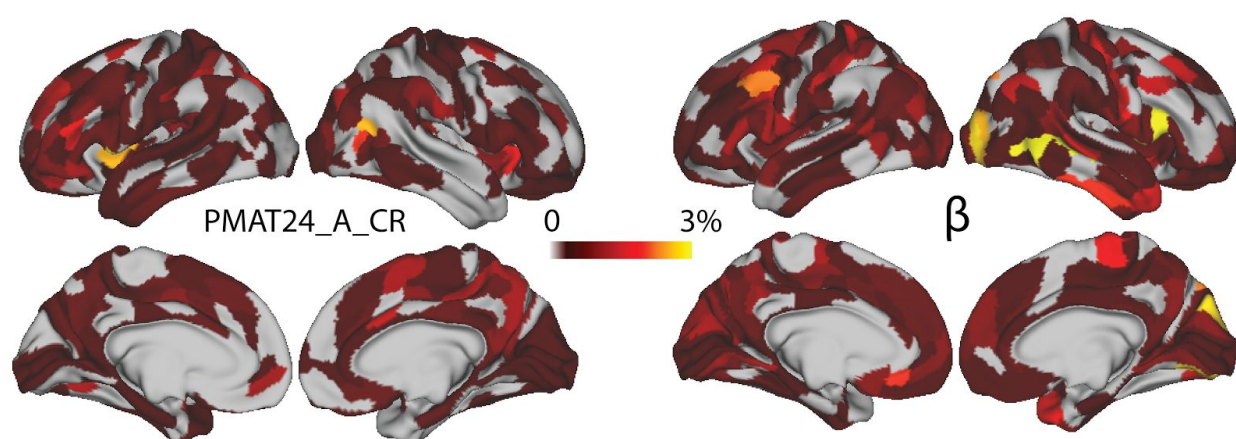

**Figure 6. Visualization of the nodes that participate in the prediction of IQ and superordinate factor  $\beta$ .** Here we show, for each node of the MSM-All parcellation, the total number of edges that are selected by the initial feature selection step (Pearson correlation with de-confounded score at  $p < 0.01$ ), across sessions and denoising strategies. The color scale

indicates the number of edges that include that particular node (as a proportion of the maximum, which for our 360-parcellation scheme is 359). Note that this does not straightforwardly translate into the predictive contribution of the node.

## Discussion

### Summary of results

Connectome-based predictive modeling (Dubois & Adolphs, 2016; Xilin Shen et al., 2017) has been an active field of research in the past years: it consists in using functional connectivity as measured from resting-state fMRI data to predict individual differences in demographics, behavior, psychological profile, or psychiatric diagnosis. Here, we applied this approach and attempted to predict the Big Five personality factors (R. R. McCrae & Costa, 1987) from resting-state data in a large public dataset, the Human Connectome Project (N=867 after exclusion criteria). We can summarize our findings as follows.

1. We found that personality traits were not only intercorrelated with one another, but were also correlated with IQ, age, sex and other measures. We therefore regressed these possible confounds out, producing a residualized set of personality trait measures (that were, however, still intercorrelated amongst themselves).

2. Comparing our different processing pipelines and data from different fMRI sessions showed generally good stability of functional connectivity across time, a prerequisite for attempting to predict a personality trait that is also stable across time.

3. We replicated and extended a previously published finding, the prediction of a measure of IQ (Finn et al., 2015; Noble et al., 2017) from functional connectivity patterns, providing reassurance that our approach is able to predict individual differences when possible.

4. We then carried out a total of 24 different analyses for each of the five personality factors, as well as for the superordinate factors  $\alpha$  and  $\beta$  that were derived from factor analysis of item-wise NEO-FFI responses in our subject sample. The 24 different analyses resulted from using 2 different data sets (2 sessions, establishing test-retest reliability), 3 different preprocessing pipelines (exploring sensitivity to how the fMRI data are processed), 2 different alignment and hard parcellation schemes (providing initial results whether surface-based or volumetric parcels work better), and 2 different predictive models (univariate and multivariate). Across all of these 24 alternatives, we generally found that the MSM-All multimodal parcellation scheme of Glasser et al. (2016) worked best, and that the multivariate model (elastic net) worked best. This provides preliminary confirmation that these approaches yield greater information from fMRI data to predict individual differences, recommending them for future studies in personality neuroscience as well.

5. Among the personality measures, only Extraversion and Openness could be weakly predicted (best correlations approaching 0.2 with mean correlations of .11 and .08, respectively). The superordinate  $\beta$  factor (personal growth/plasticity) was the most reliably predicted of all, with an effect size similar to the prediction of IQ (mean  $r=.12$ ). It was notable

that predictions were often highly unstable, showing large variation depending on small changes in preprocessing, or across session datasets.

At best, our predictions reached a score (correlation between predicted and measured scores)  $r \approx 0.2$ . In interpreting the statistical significance of any single finding, we note that one would have to correct for all the multiple analysis pipelines that we tested; future replications or extensions of this work would benefit from a pre-registered single approach to reduce the degrees of freedom in the analysis.

We also want to draw attention to how small an effect an  $r=0.2$  actually is. It may be significant, in a large enough population of subjects like the one considered here (and ignoring the multiple comparison issue just noted). Yet, in terms of explained variance, it only corresponds to 4%. This means that our very best model only explains about 4% of the variance in the best predicted scores (IQ and superordinate factor  $\beta$ ). We are thus still far from understanding the neurobiological substrates of IQ and personality (Yarkoni., 2015). Indeed, based on this finding, it seems unlikely that findings from predictive approaches using whole-brain resting-state fMRI will inform hypotheses about specific neural systems that provide a causal mechanistic explanation of personality. This conclusion was also borne out by an exploration of the neuroanatomical parcels containing the greatest proportion of predictive edges (Figure 6), which did not show much anatomical specificity.

Taken together, our approach of performing what amounted to 24 different analyses for each personality factor provided important general guidelines for personality neuroscience studies using resting-state fMRI data: i) operations that are sometimes taken as granted, such as resting-state fMRI denoising (Abraham et al., 2016), make a difference on the outcome of connectome-based predictions and their test-retest reliability; ii) new inter-subject alignment procedures, such as multimodal surface matching (Robinson et al., 2014), improve performance and test-retest reliability; iii) a simple multivariate linear model may be a good alternative to the separate univariate models proposed by (Finn et al., 2015), yielding improved performance.

Our approach also draws attention to the tremendous analytical flexibility that is available in principle (Carp, 2012), and to the all-too-common practice of keeping such explorations “behind the scenes” and only reporting the “best” strategy, leading to an inflation of positive findings reported in the literature (Neuroskeptic, 2012; Simonsohn, Nelson, & Simmons, 2014). At a certain level, if all analyses conducted make sense (i.e., would pass a careful expert reviewer’s scrutiny), they should all give a similar answer to the final question (inter-rater reliability (Dubois & Adolphs, 2016)).

## Effect of subject alignment

The recently proposed multimodal surface matching framework uses a combination of anatomical and functional features to best align subject cortices. It improves functional inter-subject alignment over the classical approach of warping brains volumetrically (Dubois & Adolphs, 2016). For the scores that can be predicted from functional connectivity, alignment in the MSM-All space outperformed alignment in the MNI space. However, more work needs to be done to further establish the superiority of the MSM-All approach. Indeed, the parcellations used in this study differed between the MNI and MSM-All space: the parcellation in MSM-All space

had more nodes (360, vs. 268) and no subcortical structures were included. Also, it is unclear how the use of resting-state data during the alignment process in the MSM-All framework interacts with resting-state based predictions, since the same data used for predictions has already been used to align subjects.

## Effect of preprocessing

We applied three separate, reasonable denoising strategies, inspired from published work (Ciric et al., 2017; Finn et al., 2015; Satterthwaite, Elliott, et al., 2013; Siegel et al., 2016) and our current understanding of resting-state fMRI confounds (Caballero-Gaudes & Reynolds, 2016; Murphy et al., 2013). The differences between the three denoising strategies in terms of the resulting test-retest reliability, based on several metrics, were not very large - yet, there were differences. Pipeline A appeared to yield the best reliability in terms of behavioral utility, while Pipeline B was best at conserving differences across subjects. Pipeline C performed worst on these metrics in our hands, despite its use of the automated artifact removal tool ICA-FIX (Salimi-Khorshidi et al., 2014); it is possible that performing CompCor and censoring are in fact detrimental after ICA-FIX (see also (Muschelli et al., 2014)). Finally, in terms of the final predictive score, all three strategies demonstrated acceptable test-retest reliability for scores that were successfully predicted. There are of course many more metrics one should use to properly assess the differences between denoising strategies, and a full exploration of the topic was outside the scope of the present study.

## Effect of predictive algorithm

Our exploration of a multivariate model was motivated by the seemingly arbitrary decision to weigh all edges equally in the univariate model proposed by (Finn et al., 2015). However, we also recognize the need for simple models, given the paucity of data compared to the number of features (curse of dimensionality). We thus explored a regularized regression model that would combine information from negative and positive edges optimally, after performing the same feature-filtering step as in the univariate model. The multivariate model performed best on the scores that were predicted most reliably, yet it also seemed to have lower test-retest reliability. More work remains to be done on this front to find the best simple model that optimally combines information from all edges and can be trained in a situation with limited data.

## Statistical significance

It is inappropriate to assess statistical significance using parametric statistics in the case of a cross-validation analysis (**Figure 4b**). However, for complex analyses, it is often the preferred option, due to the prohibitive computational resources needed to run permutation tests. Here we showed the empirical distribution of chance prediction scores for both the univariate- and multivariate-model predictions of IQ (*PMAT24\_A\_CR*) using denoising pipeline A in MNI space (**Figure 4b**). As expected, the permutation distribution is wider than the parametric estimate; it also differs significantly between the univariate and the multivariate

models. This finding stresses that one needs to calculate permutation statistics for the specific analysis that one runs. The calculation of permutation statistics should be feasible given the rapid increase and ready availability of computing clusters with multiple processors. Here we also ran permutation testing for the prediction of superordinate factor  $\beta$ , using denoising pipeline A in MSM-All space and the multivariate model, to assess the statistical significance of that particular result.

### Will our findings reproduce?

Unfortunately, we were not able to test the reproducibility of our current findings in a completely separate subject cohort, as at the time of the analyses we were not aware of another resting-state fMRI dataset of sufficient quality and sample size. Of course, assessing personality a posteriori for existing large resting-state fMRI public repositories may be an option worth considering (Mar et al., 2013). It is common practice in machine learning competitions to set aside a portion of your data and not look at it at all until a final analysis has been decided, and only then to run that single final analysis on the held-out data to establish out-of-sample replication. We decided not to split our dataset in that way due to its already limited sample size, and instead used a careful cross-validation framework and refrained from adaptively changing parameters upon examining the final results. Even in light of these precautions, we would stop short of claiming that we have uncovered the neural basis for IQ and  $\beta$ . The current paper should now serve as the basis of a pre-registered replication, when another suitable dataset becomes available.

## On the relationship between brain and personality

The best neural predictor of personality may be distinct, wholly or in part, from the actual neural mechanisms by which personality expresses itself on any given occasion. Personality may stem from a disjunctive and heterogeneous set of biological constraints that in turn influence brain function in complex ways (Yarkoni., 2015); neural predictors may simply be conceived of as “markers” of personality: any correlated measures that a machine learning algorithm could use as information, on the basis of which it could be trained in a supervised fashion to discriminate among personality traits. It may well someday be possible to predict personality differences from fMRI data with much greater accuracy than what we found here, in the same supervised framework where the personality traits have been defined and distinguished based on behavioral criteria in the first place. We think it likely that, in general, such an approach will still fall short of uncovering the neural mechanisms behind personality, in the sense of explaining the proximal causal processes whereby personality is expressed in behavior on specific occasions.

## Subjective and objective measures of personality

As noted already in the introduction, it is worth keeping in mind the history of the Big Five: they derive from factor analyses of words, of the vocabularies that we use to describe people. As such, they fundamentally reflect our folk psychology, and our social inferences (“theory of mind”) about other people. This factor structure was then used to design a self-report instrument, in which participants are asked about themselves (the NEO or variations thereof). Unlike some other self-report indices (such as the MMPI), the NEO-FFI does not assess test-taking approach (e.g. consistency across items or tendency toward a particular response set), and thus, offers no insight regarding validity of any individual’s responses. This is a notable limitation, as there is substantial evidence that NEO-FFI scores may be intentionally manipulated by the subject’s response set (Furnham, 1997; Topping & O’Gorman, 1997). Even in the absence of intentional ‘faking’, NEO outcomes are likely to be influenced by an individual’s insight, impression management, and reference group effects. However, these limitations may be addressed by applying the same analysis to multiple personality measures with varying degrees of face-validity and objectivity, as well as measures that include indices of response bias. This might include ratings provided by a familiar informant, implicit-association tests (e.g. (Schnabel, Asendorpf, & Greenwald, 2008)), and spontaneous behavior (e.g. (Mehl, Gosling, & Pennebaker, 2006)). Future development of measures of personality that provide better convergent validity and specificity will be an important component of personality neuroscience.

## Limitations and Future Directions

There are several limitations of the present study that could be improved upon or extended in future work. In addition to the obvious issue of simply needing more, and/or better quality, data, there is the important issue of obtaining a better estimate of variability within a single subject. This is especially pertinent for personality traits, which are supposed to be relatively stable within an individual. Thus, collecting multiple fMRI datasets, perhaps over weeks or even years, could help to find those features in the data with the best cross-temporal stability. Indeed several such dense datasets across multiple sessions in a few subjects have already been collected, and may already help guide the intelligent selection of features with the greatest temporal stability (Gordon et al., 2017; Noble et al., 2017; Poldrack et al., 2015). Against expectations, initial analyses seem to indicate that the most reliable edges in FC from such studies are not necessarily the most predictive edges (for IQ; (Noble et al., 2017)), yet more work needs to be done to further test this hypothesis. It is also possible that shorter timescale fluctuations in resting-state fMRI provide additional information (if these are stable over longer times), and it might thus be fruitful to explore dynamic FC, as some work has done (Calhoun, Miller, Pearlson, & Adalı, 2014; Jia, Hu, & Deshpande, 2014; Vidaurre, Smith, & Woolrich, 2017).

No less important would be improvements on the behavioral end, as we alluded to in the previous section. Developing additional tests of personality to provide convergent validity to the personality dimension constructs would help provide a more accurate estimate of these latent variables. Just as with the fMRI data, collecting personality scores across time should help to prioritize those items that have the greatest temporal stability and reduce measurement error. It is interesting to note in this regard that we tended to find better predictability of personality for that session of rs-fMRI data that was collected around the same point in time as the NEO-FFI scores (REST2).

Another limitation is signal-to-noise. It may be worth exploring fMRI data obtained while watching a movie that drives relevant brain function, rather than during rest, in order to maximize the signal variance in the fMRI signal. Similarly, it could be beneficial to include participants with a greater range of personality scores, perhaps even including those with a personality disorder. A greater range of signal both on the fMRI end and on the behavioral end would help provide greater power to detect associations.

The models we used, like most in the literature, were linear. Nonlinear models may be more appropriate, yet the difficulty in using such models is that they would require a much larger number of training samples relative to the number of features in the dataset. This could be accomplished both by accruing ever larger databases of rs-fMRI data, and by further reducing the dimensionality of the data, for instance through PCA or coarser parcellations. Alternatively, one could form a hypothesis about the shape of the function that might best predict personality scores and explicitly include this in a model.

A final important but complex issue concerns the correlation between most behavioral measures. In our analyses, we regressed out IQ, age, and sex, amongst other variables. But there are many more that are likely to be correlated with personality at some level. If one regressed out all possible measures, one would likely end up removing what one is interested in, since eventually the residual of personality would shrink to a very small range. An alternative approach is to use the raw personality scores (without any removal of confounds at all), and then selectively regress out IQ, memory task performance, mood, etc., and make comparisons between the results obtained. This could yield insights into which other variables are driving the predictability of a personality trait. It could also suggest specific new variables to investigate in their own right.

## Recommendations for Personality Neuroscience

There are well known challenges to the reliability and reproducibility of findings in personality neuroscience, which we have already mentioned. The field shares these with any other attempt to link neuroscience data with individual differences (Dubois & Adolphs, 2016). We conclude with some specific recommendations for the field going forward, focusing on the use of resting-state fMRI data.

i) Given the effect sizes that we report here (which are by no means a robust estimate, yet do provide a basis on which to build), we think it would be fair to recommend a minimum sample size of 500 or so subjects (Schönbrodt & Perugini, 2013) for connectome-based predictions. If other metrics are used, a careful estimate of effect size that adjusts for bias in the

literature should be undertaken for the specific brain measure of interest (cf. (Anderson, Kelley, & Maxwell, 2017)).

ii) A predictive framework is essential (Dubois & Adolphs, 2016; Yarkoni & Westfall, 2017), as it ensures out-of-sample reliability. Personality neuroscience studies should use proper cross-validation (in the case of the HCP, taking family structure into account), with permutation statistics where feasible. Even better, studies should include a replication sample which is held out and not examined at all until the final model has been decided from the discovery sample (advanced methods may help implement this in a more practical manner (Dwork et al., 2015)).

iii) Data sharing. If new data are collected by individual labs, it would be very important to make these available, in order to eventually accrue the largest possible sample size in a database. It has been suggested that contact information about the participants would also be valuable, so that additional measures (or retest reliability) could be collected (Mar et al., 2013). Some of these data could be collected over the internet.

iv) Complete transparency and documentation of all analyses, including sharing of all analysis scripts, so that the methods of published studies can be reproduced. Several papers give more detailed recommendations for using and reporting fMRI data, see (Dubois & Adolphs, 2016; Nichols et al., 2016; Poldrack et al., 2008). Our paper makes specific recommendation about detailed parcellation, processing and modeling pipelines; however, this is a continuously evolving field and these recommendations will likely change with future work. For personality in particular, detailed assessment for all participants, and justified exclusionary and inclusionary criteria should be provided. As suggested above, authors should consider pre-registering their study, on the Open Science Framework or a similar platform.

v) Ensure reliable and uniform behavioral estimates of personality. This is perhaps one of the largest unsolved challenges. Compared with the huge ongoing effort and continuous development of the processing and analysis of fMRI data, the measures for personality are mostly stagnant and face many problems of validity. For the time being, a simple recommendation would be to use a consistent instrument and stick with the Big-Five, so as not to mix apples and oranges by using very different instruments. That said, it will be important to explore other personality measures and structures. As we noted above, there is in principle a large range of more subjective, or more objective, measures of personality. It would be a boon to the field if these were more systematically collected and explored.

(vi) Last but not least, we should consider methods in addition to fMRI and species in addition to humans. To the extent that a human personality dimension appears to have a valid correlate in an animal model, it might be possible to collect large datasets, and to complement fMRI with optical imaging or other modalities. Studies in animals may also yield the most powerful tools to examine specific neural circuits, a level of causal mechanism that, as we argued above, may largely elude analyses using resting-state fMRI.

## Author contributions



J. Dubois and P. Galdi developed the overall general analysis framework over the course of a year. P. Galdi conducted some of the initial analyses for the paper under the supervision of J. Dubois. J. Dubois conducted all final analyses and produced all figures. Y. Han helped with literature search and analysis of behavioral data. L. Paul helped with literature search, analysis of behavioral data, and interpretation of the results. J. Dubois and R. Adolphs wrote the initial manuscript and all authors contributed to the final manuscript. All authors contributed to planning and discussion on this project. The authors declare no conflict of interest.

## Acknowledgments

Supported by NIMH grant 2P50MH094258.

## Data Sharing

The HCP datasets are publicly available. All details and analysis scripts are available from the authors upon request. Analysis scripts are being prepared for sharing in a public repository.

## References

- Abraham, A., Milham, M., Martino, A. D., Craddock, R. C., Samaras, D., Thirion, B., & Varoquaux, G. (2016). Deriving reproducible biomarkers from multi-site resting-state data: An Autism-based example. *NeuroImage*. <https://doi.org/10.1016/j.neuroimage.2016.10.045>
- Abraham, A., Pedregosa, F., Eickenberg, M., Gervais, P., Mueller, A., Kossaifi, J., ... Varoquaux, G. (2014). Machine learning for neuroimaging with scikit-learn. *Frontiers in Neuroinformatics*, 8, 14. <https://doi.org/10.3389/fninf.2014.00014>
- Adelstein, J. S., Shehzad, Z., Mennes, M., Deyoung, C. G., Zuo, X.-N., Kelly, C., ... Milham, M. P. (2011). Personality is reflected in the brain's intrinsic functional architecture. *PLoS One*, 6(11), e27633. <https://doi.org/10.1371/journal.pone.0027633>
- Aghajani, M., Veer, I. M., van Tol, M.-J., Aleman, A., van Buchem, M. A., Veltman, D. J., ... van der Wee, N. J. (2014). Neuroticism and extraversion are associated with amygdala resting-state functional connectivity. *Cognitive, Affective & Behavioral Neuroscience*, 14(2), 836–848. <https://doi.org/10.3758/s13415-013-0224-0>
- Allemand, M., Zimprich, D., & Hendriks, A. A. J. (2008). Age differences in five personality domains across the life span. *Developmental Psychology*, 44(3), 758–770. <https://doi.org/10.1037/0012-1649.44.3.758>
- Amelang, M., Borkenau - Zeitschrift fuer Differentielle und, P., & 1982. (1982). Über die faktorielle Struktur und externe Validität einiger Fragebogen-Skalen zur Erfassung von Dimensionen der Extraversion und emotionalen Labilität. *Psycnet.apa.org*. Retrieved from <http://psycnet.apa.org/psycinfo/1983-22406-001>
- Anderson, S. F., Kelley, K., & Maxwell, S. E. (2017). Sample-Size Planning for More Accurate

- Statistical Power: A Method Adjusting Sample Effect Sizes for Publication Bias and Uncertainty. *Psychological Science*, 956797617723724.  
<https://doi.org/10.1177/0956797617723724>
- Ashburner, J., & Friston, K. J. (2000). Voxel-based morphometry--the methods. *NeuroImage*, 11(6 Pt 1), 805–821. <https://doi.org/10.1006/nimg.2000.0582>
- Back, M. D., Schmukle, S. C., & Egloff, B. (2009). Predicting actual behavior from the explicit and implicit self-concept of personality. *Journal of Personality and Social Psychology*, 97(3), 533–548. <https://doi.org/10.1037/a0016229>
- Baeken, C., Marinazzo, D., Van Schuerbeek, P., Wu, G.-R., De Mey, J., Luyckaert, R., & De Raedt, R. (2014). Left and Right Amygdala - Medial Frontal Cortical Functional Connectivity Is Differentially Modulated by Harm Avoidance. *PloS One*, 9(4), e95740.  
<https://doi.org/10.1371/journal.pone.0095740>
- Bartels, M., van Weegen, F. I., van Beijsterveldt, C. E. M., Carlier, M., Polderman, T. J. C., Hoekstra, R. A., & Boomsma, D. I. (2012). The five factor model of personality and intelligence: A twin study on the relationship between the two constructs. *Personality and Individual Differences*, 53(4), 368–373. <https://doi.org/10.1016/j.paid.2012.02.007>
- Beaty, R. E., Benedek, M., Wilkins, R. W., Jauk, E., Fink, A., Silvia, P. J., ... Neubauer, A. C. (2014). Creativity and the default network: A functional connectivity analysis of the creative brain at rest. *Neuropsychologia*, 64, 92–98.  
<https://doi.org/10.1016/j.neuropsychologia.2014.09.019>
- Beaty, R. E., Kaufman, S. B., Benedek, M., Jung, R. E., Kenett, Y. N., Jauk, E., ... Silvia, P. J. (2016). Personality and complex brain networks: The role of openness to experience in default network efficiency. *Human Brain Mapping*, 37(2), 773–779.  
<https://doi.org/10.1002/hbm.23065>
- Behzadi, Y., Restom, K., Liu, J., & Liu, T. T. (2007). A component based noise correction method (CompCor) for BOLD and perfusion based fMRI. *NeuroImage*, 37(1), 90–101.  
<https://doi.org/10.1016/j.neuroimage.2007.04.042>
- Bilker, W. B., Hansen, J. A., Brensinger, C. M., Richard, J., Gur, R. E., & Gur, R. C. (2012). Development of abbreviated nine-item forms of the Raven's standard progressive matrices test. *Assessment*, 19(3), 354–369. <https://doi.org/10.1177/1073191112446655>
- Birn, R. M., Shackman, A. J., Oler, J. A., Williams, L. E., McFarlin, D. R., Rogers, G. M., ... Kalin, N. H. (2014). Evolutionarily conserved prefrontal-amygdalar dysfunction in early-life anxiety. *Molecular Psychiatry*, 19(8), 915–922. <https://doi.org/10.1038/mp.2014.46>
- Biswal, B. B., Mennes, M., Zuo, X.-N., Gohel, S., Kelly, C., Smith, S. M., ... Milham, M. P. (2010). Toward discovery science of human brain function. *Proceedings of the National Academy of Sciences of the United States of America*, 107(10), 4734–4739.  
<https://doi.org/10.1073/pnas.0911855107>
- Bjørnebekk, A., Fjell, A. M., Walhovd, K. B., Grydeland, H., Torgersen, S., & Westlye, L. T. (2013). Neuronal correlates of the five factor model (FFM) of human personality: Multimodal imaging in a large healthy sample. *NeuroImage*, 65(Supplement C), 194–208.  
<https://doi.org/10.1016/j.neuroimage.2012.10.009>
- Blackburn, R., Renwick, S. J. D., Donnelly, J. P., & Logan, C. (2004). Big Five or Big Two? Superordinate factors in the NEO Five Factor Inventory and the Antisocial Personality Questionnaire. *Personality and Individual Differences*, 37(5), 957–970.  
<https://doi.org/10.1016/j.paid.2003.10.017>
- Blankstein, U., Chen, J. Y. W., Mincic, A. M., McGrath, P. A., & Davis, K. D. (2009). The complex minds of teenagers: neuroanatomy of personality differs between sexes. *Neuropsychologia*, 47(2), 599–603. <https://doi.org/10.1016/j.neuropsychologia.2008.10.014>

- Block, J. (1995). A contrarian view of the five-factor approach to personality description. *Psychological Bulletin*, 117(2), 187–215. Retrieved from <https://www.ncbi.nlm.nih.gov/pubmed/7724687>
- Borgatta, E. F. (1964). The structure of personality characteristics. *Systems Research: The Official Journal of the International Federation for Systems Research*, 9(1), 8–17. <https://doi.org/10.1002/bs.3830090103>
- Bouchard, T. J., Jr., & McGue, M. (2003). Genetic and environmental influences on human psychological differences. *Journal of Neurobiology*, 54(1), 4–45. <https://doi.org/10.1002/neu.10160>
- Button, K. S., Ioannidis, J. P. A., Mokrysz, C., Nosek, B. A., Flint, J., Robinson, E. S. J., & Munafò, M. R. (2013). Power failure: why small sample size undermines the reliability of neuroscience. *Nature Reviews. Neuroscience*, 14(5), 365–376. <https://doi.org/10.1038/nrn3475>
- Caballero-Gaudes, C., & Reynolds, R. C. (2016). Methods for cleaning the BOLD fMRI signal. *NeuroImage*. <https://doi.org/10.1016/j.neuroimage.2016.12.018>
- Calhoun, V. D., Miller, R., Pearlson, G., & Adalı, T. (2014). The Chronnectome: Time-Varying Connectivity Networks as the Next Frontier in fMRI Data Discovery. *Neuron*, 84(2), 262–274. <https://doi.org/10.1016/j.neuron.2014.10.015>
- Canli, T. (2006). *Biology of Personality and Individual Differences*. Guilford Press. Retrieved from <https://market.android.com/details?id=book-DH-IWaVdRHIC>
- Canli, T., Zhao, Z., Desmond, J. E., Kang, E., Gross, J., & Gabrieli, J. D. (2001). An fMRI study of personality influences on brain reactivity to emotional stimuli. *Behavioral Neuroscience*, 115(1), 33–42. Retrieved from <https://www.ncbi.nlm.nih.gov/pubmed/11256451>
- Carp, J. (2012). On the plurality of (methodological) worlds: estimating the analytic flexibility of FMRI experiments. *Frontiers in Neuroscience*, 6, 149. <https://doi.org/10.3389/fnins.2012.00149>
- Cattell, R. B. (1945). The Description of Personality: Principles and Findings in a Factor Analysis. *The American Journal of Psychology*, 58(1), 69–90. <https://doi.org/10.2307/1417576>
- Chamorro-Premuzic, T., & Furnham, A. (2004). A possible model for understanding the personality-intelligence interface. *British Journal of Psychology*, 95(2), 249–264. Retrieved from <http://onlinelibrary.wiley.com/doi/10.1348/000712604773952458/full>
- Ciric, R., Wolf, D. H., Power, J. D., Roalf, D. R., Baum, G., Ruparel, K., ... Satterthwaite, T. D. (2017). Benchmarking of participant-level confound regression strategies for the control of motion artifact in studies of functional connectivity. *NeuroImage*. <https://doi.org/10.1016/j.neuroimage.2017.03.020>
- Cohen, M. X., Schoene-Bake, J.-C., Elger, C. E., & Weber, B. (2008). Connectivity-based segregation of the human striatum predicts personality characteristics. *Nature Neuroscience*, 12(1), 32–34. <https://doi.org/10.1038/nn.2228>
- Cole, M. W., Yarkoni, T., Repovs, G., Anticevic, A., & Braver, T. S. (2012). Global connectivity of prefrontal cortex predicts cognitive control and intelligence. *The Journal of Neuroscience: The Official Journal of the Society for Neuroscience*, 32(26), 8988–8999. <https://doi.org/10.1523/JNEUROSCI.0536-12.2012>
- Combrisson, E., & Jerbi, K. (2015). Exceeding chance level by chance: The caveat of theoretical chance levels in brain signal classification and statistical assessment of decoding accuracy. *Journal of Neuroscience Methods*, 250, 126–136. <https://doi.org/10.1016/j.jneumeth.2015.01.010>
- Costa, P. T., Jr., & McCrae, R. R. (1995). Domains and facets: hierarchical personality

- assessment using the revised NEO personality inventory. *Journal of Personality Assessment*, 64(1), 21–50. [https://doi.org/10.1207/s15327752jpa6401\\_2](https://doi.org/10.1207/s15327752jpa6401_2)
- Costa, P. T., & McCrae, R. R. (1992). Neo PI-R professional manual. Odessa, FL: *Psychological Assessment Resources*, 396, 653–665.
- Costa, P. T., Terracciano, A., & McCrae, R. R. (2001). Gender differences in personality traits across cultures: robust and surprising findings. *Journal of Personality and Social Psychology*, 81(2), 322–331. <https://doi.org/10.1037/0022-3514.81.2.322>
- Coutinho, J. F., Sampaio, A., Ferreira, M., Soares, J. M., & Gonçalves, O. F. (2013). Brain correlates of pro-social personality traits: a voxel-based morphometry study. *Brain Imaging and Behavior*, 7(3), 293–299. <https://doi.org/10.1007/s11682-013-9227-2>
- Crum, R. M., Anthony, J. C., Bassett, S. S., & Folstein, M. F. (1993). Population-based norms for the Mini-Mental State Examination by age and educational level. *JAMA: The Journal of the American Medical Association*, 269(18), 2386–2391. Retrieved from <https://www.ncbi.nlm.nih.gov/pubmed/8479064>
- D'Agostino, R., & Pearson, E. S. (1973). Tests for Departure from Normality. Empirical Results for the Distributions of  $b_2$  and  $\sqrt{b_1}$ . *Biometrika*, 60(3), 613–622. <https://doi.org/10.2307/2335012>
- Deris, N., Montag, C., Reuter, M., Weber, B., & Markett, S. (2017). Functional connectivity in the resting brain as biological correlate of the Affective Neuroscience Personality Scales. *NeuroImage*, 147(Supplement C), 423–431. <https://doi.org/10.1016/j.neuroimage.2016.11.063>
- DeYoung, C. G. (2006). Higher-order factors of the Big Five in a multi-informant sample. *Journal of Personality and Social Psychology*, 91(6), 1138–1151. <https://doi.org/10.1037/0022-3514.91.6.1138>
- DeYoung, C. G., Hirsh, J. B., Shane, M. S., Papademetris, X., Rajeevan, N., & Gray, J. R. (2010). Testing predictions from personality neuroscience. Brain structure and the big five. *Psychological Science*, 21(6), 820–828. <https://doi.org/10.1177/0956797610370159>
- Digman, J. M. (1997). Higher-order factors of the Big Five. *Journal of Personality and Social Psychology*, 73(6), 1246–1256. Retrieved from <https://www.ncbi.nlm.nih.gov/pubmed/9418278>
- Dosenbach, N. U. F., Nardos, B., Cohen, A. L., Fair, D. A., Power, J. D., Church, J. A., ... Schlaggar, B. L. (2010). Prediction of individual brain maturity using fMRI. *Science*, 329(5997), 1358–1361. <https://doi.org/10.1126/science.1194144>
- Dubois, J., & Adolphs, R. (2016). Building a Science of Individual Differences from fMRI. *Trends in Cognitive Sciences*, 20(6), 425–443. <https://doi.org/10.1016/j.tics.2016.03.014>
- Dwork, C., Feldman, V., Hardt, M., Pitassi, T., Reingold, O., & Roth, A. (2015). STATISTICS. The reusable holdout: Preserving validity in adaptive data analysis. *Science*, 349(6248), 636–638. <https://doi.org/10.1126/science.aaa9375>
- Egan, V., Deary, I., & Austin, E. (2000). The NEO-FFI: emerging British norms and an item-level analysis suggest N, A and C are more reliable than O and E. *Personality and Individual Differences*, 29(5), 907–920. [https://doi.org/10.1016/S0191-8869\(99\)00242-1](https://doi.org/10.1016/S0191-8869(99)00242-1)
- Eickhoff, S., Nichols, T. E., Van Horn, J. D., & Turner, J. A. (2016). Sharing the wealth: Neuroimaging data repositories. *NeuroImage*, 124(Pt B), 1065–1068. <https://doi.org/10.1016/j.neuroimage.2015.10.079>
- Elam, J. (2015, March 16). Ramifications of Image Reconstruction Version Differences. Retrieved from <https://wiki.humanconnectome.org/display/PublicData/Ramifications+of+Image+Reconstruction+Version+Differences>

- Feingold, A. (1994). Gender differences in personality: a meta-analysis. *Psychological Bulletin*, 116(3), 429. Retrieved from <http://psycnet.apa.org/psycinfo/1995-09434-001>
- Finn, E. S., Shen, X., Scheinost, D., Rosenberg, M. D., Huang, J., Chun, M. M., ... Constable, R. T. (2015). Functional connectome fingerprinting: identifying individuals using patterns of brain connectivity. *Nature Neuroscience*, 18(11), 1664–1671. <https://doi.org/10.1038/nn.4135>
- Fiske, D. W. (1949). Consistency of the factorial structures of personality ratings from different sources. *Journal of Abnormal Psychology*, 44(3), 329–344. Retrieved from <https://www.ncbi.nlm.nih.gov/pubmed/18146776>
- Furnham, A. F. (1997). Knowing and faking one's five-factor personality score. *Journal of Personality Assessment*, 69(1), 229–243. Retrieved from [http://www.tandfonline.com/doi/abs/10.1207/s15327752jpa6901\\_14](http://www.tandfonline.com/doi/abs/10.1207/s15327752jpa6901_14)
- Furr, R. M. (2009). Personality psychology as a truly behavioural science. *European Journal of Personality*, 23(5), 369–401. Retrieved from <http://onlinelibrary.wiley.com/doi/10.1002/per.724/full>
- Gabrieli, J. D. E., Ghosh, S. S., & Whitfield-Gabrieli, S. (2015). Prediction as a humanitarian and pragmatic contribution from human cognitive neuroscience. *Neuron*, 85(1), 11–26. <https://doi.org/10.1016/j.neuron.2014.10.047>
- Gao, Q., Xu, Q., Long, Z., Duan, X., Liao, W., Ding, J., ... Chen, H. (2013). Extraversion and neuroticism relate to topological properties of resting-state brain networks. *Frontiers in Human Neuroscience*, 7, 257. <https://doi.org/10.3389/fnhum.2013.00257>
- Geerligs, L., Renken, R. J., Saliassi, E., Maurits, N. M., & Lorist, M. M. (2015). A Brain-Wide Study of Age-Related Changes in Functional Connectivity. *Cerebral Cortex*, 25(7), 1987–1999. <https://doi.org/10.1093/cercor/bhu012>
- Geerligs, L., Rubinov, M., Cam-Can, & Henson, R. N. (2015). State and Trait Components of Functional Connectivity: Individual Differences Vary with Mental State. *The Journal of Neuroscience: The Official Journal of the Society for Neuroscience*, 35(41), 13949–13961. <https://doi.org/10.1523/JNEUROSCI.1324-15.2015>
- Glasser, M. F., Coalson, T. S., Robinson, E. C., Hacker, C. D., Harwell, J., Yacoub, E., ... Van Essen, D. C. (2016). A multi-modal parcellation of human cerebral cortex. *Nature*. <https://doi.org/10.1038/nature18933>
- Glasser, M. F., Sotiropoulos, S. N., Wilson, J. A., Coalson, T. S., Fischl, B., Andersson, J. L., ... WU-Minn HCP Consortium. (2013). The minimal preprocessing pipelines for the Human Connectome Project. *NeuroImage*, 80, 105–124. <https://doi.org/10.1016/j.neuroimage.2013.04.127>
- Goldberg, L. R. (1981). Language and individual differences: The search for universals in personality lexicons. *Personality and Social Psychology Review: An Official Journal of the Society for Personality and Social Psychology, Inc*, 2(1), 141–165. Retrieved from [http://projects.ori.org/lrg/PDFs\\_papers/universals.lexicon.81.pdf](http://projects.ori.org/lrg/PDFs_papers/universals.lexicon.81.pdf)
- Gordon, E. M., Laumann, T. O., Adeyemo, B., Huckins, J. F., Kelley, W. M., & Petersen, S. E. (2014). Generation and Evaluation of a Cortical Area Parcellation from Resting-State Correlations. *Cerebral Cortex*. <https://doi.org/10.1093/cercor/bhu239>
- Gordon, E. M., Laumann, T. O., Gilmore, A. W., Newbold, D. J., Greene, D. J., Berg, J. J., ... Dosenbach, N. U. F. (2017). Precision Functional Mapping of Individual Human Brains. *Neuron*. <https://doi.org/10.1016/j.neuron.2017.07.011>
- Gorgolewski, K., Burns, C. D., Madison, C., Clark, D., Halchenko, Y. O., Waskom, M. L., & Ghosh, S. S. (2011). Nipype: a flexible, lightweight and extensible neuroimaging data processing framework in python. *Frontiers in Neuroinformatics*, 5, 13.

- <https://doi.org/10.3389/fninf.2011.00013>
- Gorgolewski, K. J., Esteban, O., Ellis, D. G., Notter, M. P., Ziegler, E., Johnson, H., ... Ghosh, S. (2017, May). nipy/nipype: Release 0.13.1. <https://doi.org/10.5281/zenodo.581704>
- Gosling, S. D., & John, O. P. (1999). Personality Dimensions in Nonhuman Animals: A Cross-Species Review. *Current Directions in Psychological Science*, 8(3), 69–75. <https://doi.org/10.1111/1467-8721.00017>
- Gosling, S. D., & Vazire, S. (2002). Are we barking up the right tree? Evaluating a comparative approach to personality. *Journal of Research in Personality*, 36(6), 607–614. [https://doi.org/10.1016/S0092-6566\(02\)00511-1](https://doi.org/10.1016/S0092-6566(02)00511-1)
- Gray, J. C. (2017, October 4). NEO-FFI Agreeableness scoring. Retrieved from <https://www.mail-archive.com/hcp-users@humanconnectome.org/msg05266.html>
- Gur, R. C., Ragland, J. D., Moberg, P. J., Turner, T. H., Bilker, W. B., Kohler, C., ... Gur, R. E. (2001). Computerized neurocognitive scanning: I. Methodology and validation in healthy people. *Neuropsychopharmacology: Official Publication of the American College of Neuropsychopharmacology*, 25(5), 766–776. [https://doi.org/10.1016/S0893-133X\(01\)00278-0](https://doi.org/10.1016/S0893-133X(01)00278-0)
- Gur, R. C., Richard, J., Hughett, P., Calkins, M. E., Macy, L., Bilker, W. B., ... Gur, R. E. (2010). A cognitive neuroscience-based computerized battery for efficient measurement of individual differences: standardization and initial construct validation. *Journal of Neuroscience Methods*, 187(2), 254–262. <https://doi.org/10.1016/j.jneumeth.2009.11.017>
- Hänggi, J., Fövényi, L., Liem, F., Meyer, M., & Jäncke, L. (2014). The hypothesis of neuronal interconnectivity as a function of brain size—a general organization principle of the human connectome. *Frontiers in Human Neuroscience*, 8, 915. <https://doi.org/10.3389/fnhum.2014.00915>
- Holmes, A. J., Lee, P. H., Hollinshead, M. O., Bakst, L., Roffman, J. L., Smoller, J. W., & Buckner, R. L. (2012). Individual Differences in Amygdala-Medial Prefrontal Anatomy Link Negative Affect, Impaired Social Functioning, and Polygenic Depression Risk. *The Journal of Neuroscience: The Official Journal of the Society for Neuroscience*, 32(50), 18087–18100. <https://doi.org/10.1523/JNEUROSCI.2531-12.2012>
- Hong, R. Y., Pauson, S. V., & Slade, H. P. (2008). Big Five personality factors and the prediction of behavior: A multitrait–multimethod approach. *Personality and Individual Differences*, 45(2), 160–166. <https://doi.org/10.1016/j.paid.2008.03.015>
- Hutton, C., Draganski, B., Ashburner, J., & Weiskopf, N. (2009). A comparison between voxel-based cortical thickness and voxel-based morphometry in normal aging. *NeuroImage*, 48(2), 371–380. <https://doi.org/10.1016/j.neuroimage.2009.06.043>
- Hu, X., Erb, M., Ackermann, H., Martin, J. A., Grodd, W., & Reiterer, S. M. (2011). Voxel-based morphometry studies of personality: issue of statistical model specification—effect of nuisance covariates. *NeuroImage*, 54(3), 1994–2005. <https://doi.org/10.1016/j.neuroimage.2010.10.024>
- Jaccard, J. J. (1974). Predicting social behavior from personality traits. *Journal of Research in Personality*, 7(4), 358–367. [https://doi.org/10.1016/0092-6566\(74\)90057-9](https://doi.org/10.1016/0092-6566(74)90057-9)
- Jang, K. L., Livesley, W. J., & Vernon, P. A. (1996). Heritability of the big five personality dimensions and their facets: a twin study. *Journal of Personality*, 64(3), 577–591. Retrieved from <https://www.ncbi.nlm.nih.gov/pubmed/8776880>
- Jia, H., Hu, X., & Deshpande, G. (2014). Behavioral relevance of the dynamics of the functional brain connectome. *Brain Connectivity*, 4(9), 741–759. <https://doi.org/10.1089/brain.2014.0300>
- Jiao, B., Zhang, D., Liang, A., Liang, B., Wang, Z., Li, J., ... Liu, M. (2017). Association between

- resting-state brain network topological organization and creative ability: Evidence from a multiple linear regression model. *Biological Psychology*, 129, 165–177.  
<https://doi.org/10.1016/j.biopsycho.2017.09.003>
- Job, D. E., Dickie, D. A., Rodriguez, D., Robson, A., Danso, S., Pernet, C., ... Wardlaw, J. M. (2017). A brain imaging repository of normal structural MRI across the life course: Brain Images of Normal Subjects (BRAINS). *NeuroImage*, 144(Pt B), 299–304.  
<https://doi.org/10.1016/j.neuroimage.2016.01.027>
- Kapogiannis, D., Sutin, A., Davatzikos, C., Costa, P., Jr, & Resnick, S. (2013). The five factors of personality and regional cortical variability in the Baltimore longitudinal study of aging. *Human Brain Mapping*, 34(11), 2829–2840. <https://doi.org/10.1002/hbm.22108>
- Kim, M. J., & Whalen, P. J. (2009). The structural integrity of an amygdala-prefrontal pathway predicts trait anxiety. *The Journal of Neuroscience: The Official Journal of the Society for Neuroscience*, 29(37), 11614–11618. <https://doi.org/10.1523/JNEUROSCI.2335-09.2009>
- Laumann, T. O., Gordon, E. M., Adeyemo, B., Snyder, A. Z., Joo, S. J., Chen, M.-Y., ... Petersen, S. E. (2015). Functional System and Areal Organization of a Highly Sampled Individual Human Brain. *Neuron*, 87(3), 657–670.  
<https://doi.org/10.1016/j.neuron.2015.06.037>
- Le Bihan, D., Mangin, J. F., Poupon, C., Clark, C. A., Pappata, S., Molko, N., & Chabriat, H. (2001). Diffusion tensor imaging: concepts and applications. *Journal of Magnetic Resonance Imaging: JMRI*, 13(4), 534–546. Retrieved from <https://www.ncbi.nlm.nih.gov/pubmed/11276097>
- Lei, X., Zhao, Z., & Chen, H. (2013). Extraversion is encoded by scale-free dynamics of default mode network. *NeuroImage*, 74, 52–57. <https://doi.org/10.1016/j.neuroimage.2013.02.020>
- Leys, C., Klein, O., Dominicy, Y., & Ley, C. (2018). Detecting multivariate outliers: Use a robust variant of the Mahalanobis distance. *Journal of Experimental Social Psychology*, 74(Supplement C), 150–156. <https://doi.org/10.1016/j.jesp.2017.09.011>
- Liu, T. T. (2016). Noise contributions to the fMRI signal: An overview. *NeuroImage*, 143, 141–151. <https://doi.org/10.1016/j.neuroimage.2016.09.008>
- Liu, W.-Y., Weber, B., Reuter, M., Markett, S., Chu, W.-C., & Montag, C. (2013). The Big Five of Personality and structural imaging revisited: a VBM - DARTEL study. *Neuroreport*, 24(7), 375–380. <https://doi.org/10.1097/WNR.0b013e328360dad7>
- Logothetis, N. K., & Wandell, B. A. (2004). Interpreting the BOLD signal. *Annual Review of Physiology*, 66, 735–769. <https://doi.org/10.1146/annurev.physiol.66.082602.092845>
- Lu, F., Huo, Y., Li, M., Chen, H., Liu, F., Wang, Y., ... Chen, H. (2014). Relationship between Personality and Gray Matter Volume in Healthy Young Adults: A Voxel-Based Morphometric Study. *PloS One*, 9(2), e88763. <https://doi.org/10.1371/journal.pone.0088763>
- Mar, R. A., Spreng, R. N., & Deyoung, C. G. (2013). How to produce personality neuroscience research with high statistical power and low additional cost. *Cognitive, Affective & Behavioral Neuroscience*, 13(3), 674–685. <https://doi.org/10.3758/s13415-013-0202-6>
- McCrae, R. R., Costa - American Psychologist, P. T., & 1986. (1986). Clinical assessment can benefit from recent advances in personality psychology. *Psycnet.apa.org*. Retrieved from <http://psycnet.apa.org/journals/amp/41/9/1001/>
- McCrae, R. R., & Costa, P. T. (2004). A contemplated revision of the NEO Five-Factor Inventory. *Personality and Individual Differences*, 36(3), 587–596.  
[https://doi.org/10.1016/S0191-8869\(03\)00118-1](https://doi.org/10.1016/S0191-8869(03)00118-1)
- McCrae, R. R., & Costa, P. T., Jr. (1987). Validation of the five-factor model of personality across instruments and observers. *Journal of Personality and Social Psychology*, 52(1), 81–90. Retrieved from <https://www.ncbi.nlm.nih.gov/pubmed/3820081>

- McCrae, R. R., & John, O. P. (1992). An Introduction to the Five-Factor Model and Its Applications. *Journal of Personality*, *60*(2), 175–215.  
<https://doi.org/10.1111/j.1467-6494.1992.tb00970.x>
- McCrae, R. R., Yamagata, S., Jang, K. L., Riemann, R., Ando, J., Ono, Y., ... Spinath, F. M. (2008). Substance and artifact in the higher-order factors of the Big Five. *Journal of Personality and Social Psychology*, *95*(2), 442–455.  
<https://doi.org/10.1037/0022-3514.95.2.442>
- Mehl, M. R., Gosling, S. D., & Pennebaker, J. W. (2006). Personality in its natural habitat: manifestations and implicit folk theories of personality in daily life. *Journal of Personality and Social Psychology*, *90*(5), 862–877. <https://doi.org/10.1037/0022-3514.90.5.862>
- Miller, K. L., Alfaro-Almagro, F., Bangerter, N. K., Thomas, D. L., Yacoub, E., Xu, J., ... Smith, S. M. (2016). Multimodal population brain imaging in the UK Biobank prospective epidemiological study. *Nature Neuroscience*, *19*(11), 1523–1536.  
<https://doi.org/10.1038/nn.4393>
- Murphy, K., Birn, R. M., & Bandettini, P. A. (2013). Resting-state fMRI confounds and cleanup. *NeuroImage*, *80*, 349–359. <https://doi.org/10.1016/j.neuroimage.2013.04.001>
- Murphy, K., & Fox, M. D. (2017). Towards a consensus regarding global signal regression for resting state functional connectivity MRI. *NeuroImage*, *154*, 169–173.  
<https://doi.org/10.1016/j.neuroimage.2016.11.052>
- Muschelli, J., Nebel, M. B., Caffo, B. S., Barber, A. D., Pekar, J. J., & Mostofsky, S. H. (2014). Reduction of motion-related artifacts in resting state fMRI using aCompCor. *NeuroImage*, *96*, 22–35. <https://doi.org/10.1016/j.neuroimage.2014.03.028>
- Neuroskeptic. (2012). The Nine Circles of Scientific Hell. *Perspectives on Psychological Science: A Journal of the Association for Psychological Science*, *7*(6), 643–644.  
<https://doi.org/10.1177/1745691612459519>
- Nichols, T. E., Das, S., Eickhoff, S. B., Evans, A. C., Glatard, T., Hanke, M., ... Thomas Yeo, B. T. (2016, May 20). *Best Practices in Data Analysis and Sharing in Neuroimaging using MRI*. *bioRxiv*. <https://doi.org/10.1101/054262>
- Noble, S., Spann, M. N., Tokoglu, F., Shen, X., Constable, R. T., & Scheinost, D. (2017). Influences on the Test-Retest Reliability of Functional Connectivity MRI and its Relationship with Behavioral Utility. *Cerebral Cortex*, 1–15. <https://doi.org/10.1093/cercor/bhx230>
- Noirhomme, Q., Lesenfants, D., Gomez, F., Soddu, A., Schrouff, J., Garraux, G., ... Laureys, S. (2014). Biased binomial assessment of cross-validated estimation of classification accuracies illustrated in diagnosis predictions. *NeuroImage. Clinical*, *4*, 687–694.  
<https://doi.org/10.1016/j.nicl.2014.04.004>
- Norman, W. T. (1963). Toward an adequate taxonomy of personality attributes: replicated factors structure in peer nomination personality ratings. *Journal of Abnormal and Social Psychology*, *66*, 574–583. Retrieved from <https://www.ncbi.nlm.nih.gov/pubmed/13938947>
- Oler, J. A., Fox, A. S., Shelton, S. E., Rogers, J., Dyer, T. D., Davidson, R. J., ... Kalin, N. H. (2010). Amygdalar and hippocampal substrates of anxious temperament differ in their heritability. *Nature*, *466*(7308), 864–868. <https://doi.org/10.1038/nature09282>
- Omura, K., Todd Constable, R., & Canli, T. (2005). Amygdala gray matter concentration is associated with extraversion and neuroticism. *Neuroreport*, *16*(17), 1905–1908. Retrieved from <https://www.ncbi.nlm.nih.gov/pubmed/16272876>
- Orrù, G., Pettersson-Yeo, W., Marquand, A. F., Sartori, G., & Mechelli, A. (2012). Using Support Vector Machine to identify imaging biomarkers of neurological and psychiatric disease: a critical review. *Neuroscience and Biobehavioral Reviews*, *36*(4), 1140–1152.  
<https://doi.org/10.1016/j.neubiorev.2012.01.004>



- Pang, Y., Cui, Q., Wang, Y., Chen, Y., Wang, X., Han, S., ... Chen, H. (2016). Extraversion and neuroticism related to the resting-state effective connectivity of amygdala. *Scientific Reports*, 6, 35484. <https://doi.org/10.1038/srep35484>
- Pedregosa, F., Varoquaux, G., Gramfort, A., Michel, V., Thirion, B., Grisel, O., ... Duchesnay, É. (2011). Scikit-learn: Machine Learning in Python. *Journal of Machine Learning Research: JMLR*, 12(Oct), 2825–2830. Retrieved from <http://www.jmlr.org/papers/volume12/pedregosa11a/pedregosa11a.pdf>
- Poldrack, R. A., Fletcher, P. C., Henson, R. N., Worsley, K. J., Brett, M., & Nichols, T. E. (2008). Guidelines for reporting an fMRI study. *NeuroImage*, 40(2), 409–414. <https://doi.org/10.1016/j.neuroimage.2007.11.048>
- Poldrack, R. A., & Gorgolewski, K. J. (2015). OpenfMRI: Open sharing of task fMRI data. *NeuroImage*. <https://doi.org/10.1016/j.neuroimage.2015.05.073>
- Poldrack, R. A., Laumann, T. O., Koyejo, O., Gregory, B., Hover, A., Chen, M.-Y., ... Mumford, J. A. (2015). Long-term neural and physiological phenotyping of a single human. *Nature Communications*, 6. <https://doi.org/10.1038/ncomms9885>
- Power, J. D., Barnes, K. A., Snyder, A. Z., Schlaggar, B. L., & Petersen, S. E. (2012). Spurious but systematic correlations in functional connectivity MRI networks arise from subject motion. *NeuroImage*, 59(3), 2142–2154. <https://doi.org/10.1016/j.neuroimage.2011.10.018>
- Power, J. D., Mitra, A., Laumann, T. O., Snyder, A. Z., Schlaggar, B. L., & Petersen, S. E. (2014). Methods to detect, characterize, and remove motion artifact in resting state fMRI. *NeuroImage*, 84, 320–341. <https://doi.org/10.1016/j.neuroimage.2013.08.048>
- Power, R. A., & Pluess, M. (2015). Heritability estimates of the Big Five personality traits based on common genetic variants. *Translational Psychiatry*, 5, e604. <https://doi.org/10.1038/tp.2015.96>
- Rauch, S. L., Milad, M. R., Orr, S. P., Quinn, B. T., Fischl, B., & Pitman, R. K. (2005). Orbitofrontal thickness, retention of fear extinction, and extraversion. *Neuroreport*, 16(17), 1909–1912. Retrieved from <https://www.ncbi.nlm.nih.gov/pubmed/16272877>
- Riccelli, R., Toschi, N., Nigro, S., Terracciano, A., & Passamonti, L. (2017). Surface-based morphometry reveals the neuroanatomical basis of the five-factor model of personality. *Social Cognitive and Affective Neuroscience*, 12(4), 671–684. <https://doi.org/10.1093/scan/nsw175>
- Roberts, B. W., & DelVecchio, W. F. (2000). The rank-order consistency of personality traits from childhood to old age: a quantitative review of longitudinal studies. *Psychological Bulletin*, 126(1), 3–25. Retrieved from <https://www.ncbi.nlm.nih.gov/pubmed/10668348>
- Roberts, B. W., Kuncel, N. R., Shiner, R., Caspi, A., & Goldberg, L. R. (2007). The Power of Personality: The Comparative Validity of Personality Traits, Socioeconomic Status, and Cognitive Ability for Predicting Important Life Outcomes. *Perspectives on Psychological Science: A Journal of the Association for Psychological Science*, 2(4), 313–345. <https://doi.org/10.1111/j.1745-6916.2007.00047.x>
- Robinson, E. C., Jbabdi, S., Glasser, M. F., Andersson, J., Burgess, G. C., Harms, M. P., ... Jenkinson, M. (2014). MSM: a new flexible framework for Multimodal Surface Matching. *NeuroImage*, 100, 414–426. <https://doi.org/10.1016/j.neuroimage.2014.05.069>
- Ruigrok, A. N. V., Salimi-Khorshidi, G., Lai, M.-C., Baron-Cohen, S., Lombardo, M. V., Tait, R. J., & Suckling, J. (2014). A meta-analysis of sex differences in human brain structure. *Neuroscience and Biobehavioral Reviews*, 39, 34–50. <https://doi.org/10.1016/j.neubiorev.2013.12.004>
- Ryan, J. P., Sheu, L. K., & Gianaros, P. J. (2011). Resting state functional connectivity within the cingulate cortex jointly predicts agreeableness and stressor-evoked cardiovascular

- reactivity. *NeuroImage*, 55(1), 363–370. <https://doi.org/10.1016/j.neuroimage.2010.11.064>
- Salimi-Khorshidi, G., Douaud, G., Beckmann, C. F., Glasser, M. F., Griffanti, L., & Smith, S. M. (2014). Automatic denoising of functional MRI data: combining independent component analysis and hierarchical fusion of classifiers. *NeuroImage*, 90, 449–468. <https://doi.org/10.1016/j.neuroimage.2013.11.046>
- Satterthwaite, T. D., Elliott, M. A., Gerraty, R. T., Ruparel, K., Loughead, J., Calkins, M. E., ... Wolf, D. H. (2013). An improved framework for confound regression and filtering for control of motion artifact in the preprocessing of resting-state functional connectivity data. *NeuroImage*, 64, 240–256. <https://doi.org/10.1016/j.neuroimage.2012.08.052>
- Satterthwaite, T. D., Wolf, D. H., Ruparel, K., Erus, G., Elliott, M. A., Eickhoff, S. B., ... Gur, R. C. (2013). Heterogeneous impact of motion on fundamental patterns of developmental changes in functional connectivity during youth. *NeuroImage*, 83, 45–57. <https://doi.org/10.1016/j.neuroimage.2013.06.045>
- Saucier, G. (2002). Orthogonal Markers for Orthogonal Factors: The Case of the Big Five. *Journal of Research in Personality*, 36(1), 1–31. <https://doi.org/10.1006/jrpe.2001.2335>
- Schnabel, K., Asendorpf, J. B., & Greenwald, A. G. (2008). Understanding and using the implicit association test: V. measuring semantic aspects of trait self-concepts. *European Journal of Personality*, 22(8), 695–706. Retrieved from <http://onlinelibrary.wiley.com/doi/10.1002/per.697/full>
- Schönbrodt, F. D., & Perugini, M. (2013). At what sample size do correlations stabilize? *Journal of Research in Personality*, 47(5), 609–612. <https://doi.org/10.1016/j.jrp.2013.05.009>
- Shen, X., Finn, E. S., Scheinost, D., Rosenberg, M. D., Chun, M. M., Papademetris, X., & Todd Constable, R. (2017). Using connectome-based predictive modeling to predict individual behavior from brain connectivity. *Nature Protocols*, 12(3), 506–518. <https://doi.org/10.1038/nprot.2016.178>
- Shen, X., Tokoglu, F., Papademetris, X., & Constable, R. T. (2013). Groupwise whole-brain parcellation from resting-state fMRI data for network node identification. *NeuroImage*, 82, 403–415. <https://doi.org/10.1016/j.neuroimage.2013.05.081>
- Siegel, J. S., Mitra, A., Laumann, T. O., Seitzman, B. A., Raichle, M., Corbetta, M., & Snyder, A. Z. (2016). Data Quality Influences Observed Links Between Functional Connectivity and Behavior. *Cerebral Cortex*. <https://doi.org/10.1093/cercor/bhw253>
- Simonsohn, U., Nelson, L. D., & Simmons, J. P. (2014). P-curve: a key to the file-drawer. *Journal of Experimental Psychology. General*, 143(2), 534–547. <https://doi.org/10.1037/a0033242>
- Smith, G. M. (1967). Usefulness of Peer Ratings of Personality in Educational Research. *Educational and Psychological Measurement*, 27(4), 967–984. <https://doi.org/10.1177/001316446702700445>
- Smith, S. M., Vidaurre, D., Beckmann, C. F., Glasser, M. F., Jenkinson, M., Miller, K. L., ... Van Essen, D. C. (2013). Functional connectomics from resting-state fMRI. *Trends in Cognitive Sciences*, 17(12), 666–682. <https://doi.org/10.1016/j.tics.2013.09.016>
- Smith, S., Vidaurre, D., Glasser, M., Winkler, A., McCarthy, P., Robinson, E., ... Van Essen, D. (2016, April). Second beta-release of the HCP Functional Connectivity MegaTrawl. Retrieved from [https://db.humanconnectome.org/megatrawl/HCP820\\_MegaTrawl\\_April2016.pdf](https://db.humanconnectome.org/megatrawl/HCP820_MegaTrawl_April2016.pdf)
- Soto, C. J., John, O. P., Gosling, S. D., & Potter, J. (2011). Age differences in personality traits from 10 to 65: Big Five domains and facets in a large cross-sectional sample. *Journal of Personality and Social Psychology*, 100(2), 330–348. <https://doi.org/10.1037/a0021717>
- Sporns, O. (2013). The human connectome: origins and challenges. *NeuroImage*, 80, 53–61.

- <https://doi.org/10.1016/j.neuroimage.2013.03.023>
- Takeuchi, H., Taki, Y., Hashizume, H., Sassa, Y., Nagase, T., Nouchi, R., & Kawashima, R. (2012). The association between resting functional connectivity and creativity. *Cerebral Cortex*, 22(12), 2921–2929. <https://doi.org/10.1093/cercor/bhr371>
- Taki, Y., Thyreau, B., Kinomura, S., Sato, K., Goto, R., Wu, K., ... Fukuda, H. (2013). A longitudinal study of the relationship between personality traits and the annual rate of volume changes in regional gray matter in healthy adults. *Human Brain Mapping*, 34(12), 3347–3353. <https://doi.org/10.1002/hbm.22145>
- Todorov, A. (2017). *Face Value: The Irresistible Influence of First Impressions*. Princeton University Press. Retrieved from <https://market.android.com/details?id=book-mH8rDgAAQBAJ>
- Topping, G. D., & O’Gorman, J. G. (1997). Effects of faking set on validity of the NEO-FFI. *Personality and Individual Differences*, 23(1), 117–124. [https://doi.org/10.1016/S0191-8869\(97\)00006-8](https://doi.org/10.1016/S0191-8869(97)00006-8)
- Trabzuni, D., Ramasamy, A., Imran, S., Walker, R., Smith, C., Weale, M. E., ... North American Brain Expression Consortium. (2013). Widespread sex differences in gene expression and splicing in the adult human brain. *Nature Communications*, 4, 2771. <https://doi.org/10.1038/ncomms3771>
- Tupes, E. C., & Christal, R. E. (1961). *Recurrent personality factors based on trait ratings* (No. Technical Report ASD-TR-61-97). PERSONNEL RESEARCH LAB LACKLAND AFB TX. Retrieved from <http://www.dtic.mil/dtic/tr/fulltext/u2/267778.pdf>
- Tyszka, J. M., Kennedy, D. P., Paul, L. K., & Adolphs, R. (2014). Largely typical patterns of resting-state functional connectivity in high-functioning adults with autism. *Cerebral Cortex*, 24(7), 1894–1905. <https://doi.org/10.1093/cercor/bht040>
- Uher, J. (2015). Developing “Personality” Taxonomies: Metatheoretical and Methodological Rationales Underlying Selection Approaches, Methods of Data Generation and Reduction Principles. *Integrative Psychological & Behavioral Science*, 49(4), 531–589. <https://doi.org/10.1007/s12124-014-9280-4>
- Van Essen, D. C., Smith, S. M., Barch, D. M., Behrens, T. E. J., Yacoub, E., Ugurbil, K., & WU-Minn HCP Consortium. (2013). The WU-Minn Human Connectome Project: an overview. *NeuroImage*, 80, 62–79. <https://doi.org/10.1016/j.neuroimage.2013.05.041>
- Van Horn, J. D., & Gazzaniga, M. S. (2013). Why share data? Lessons learned from the fMRIDC. *NeuroImage*, 82, 677–682. <https://doi.org/10.1016/j.neuroimage.2012.11.010>
- Verweij, K. J. H., Zietsch, B. P., Medland, S. E., Gordon, S. D., Benyamin, B., Nyholt, D. R., ... Wray, N. R. (2010). A genome-wide association study of Cloninger’s temperament scales: implications for the evolutionary genetics of personality. *Biological Psychology*, 85(2), 306–317. <https://doi.org/10.1016/j.biopsycho.2010.07.018>
- Vidaurre, D., Smith, S. M., & Woolrich, M. W. (2017). Brain network dynamics are hierarchically organized in time. *Proceedings of the National Academy of Sciences*. <https://doi.org/10.1073/pnas.1705120114>
- Vinkhuyzen, A. A. E., Pedersen, N. L., Yang, J., Lee, S. H., Magnusson, P. K. E., Iacono, W. G., ... Wray, N. R. (2012). Common SNPs explain some of the variation in the personality dimensions of neuroticism and extraversion. *Translational Psychiatry*, 2, e102. <https://doi.org/10.1038/tp.2012.27>
- Viswesvaran, C., & Ones, D. S. (2000). Measurement Error in “Big Five Factors” Personality Assessment: Reliability Generalization across Studies and Measures. *Educational and Psychological Measurement*, 60(2), 224–235. <https://doi.org/10.1177/00131640021970475>
- Walt, S. van der, Colbert, S. C., & Varoquaux, G. (2011). The NumPy Array: A Structure for

- Efficient Numerical Computation. *Computing in Science & Engineering*, 13(2), 22–30.  
<https://doi.org/10.1109/MCSE.2011.37>
- Weisberg, Y. J., Deyoung, C. G., & Hirsh, J. B. (2011). Gender Differences in Personality across the Ten Aspects of the Big Five. *Frontiers in Psychology*, 2, 178.  
<https://doi.org/10.3389/fpsyg.2011.00178>
- Westlye, L. T., Bjørnebekk, A., Grydeland, H., Fjell, A. M., & Walhovd, K. B. (2011). Linking an anxiety-related personality trait to brain white matter microstructure: diffusion tensor imaging and harm avoidance. *Archives of General Psychiatry*, 68(4), 369–377.  
<https://doi.org/10.1001/archgenpsychiatry.2011.24>
- Woo, C.-W., Chang, L. J., Lindquist, M. A., & Wager, T. D. (2017). Building better biomarkers: brain models in translational neuroimaging. *Nature Neuroscience*, 20(3), 365–377.  
<https://doi.org/10.1038/nn.4478>
- Woo, C.-W., Krishnan, A., & Wager, T. D. (2014). Cluster-extent based thresholding in fMRI analyses: pitfalls and recommendations. *NeuroImage*, 91, 412–419.  
<https://doi.org/10.1016/j.neuroimage.2013.12.058>
- Wright, C. I., Williams, D., Feczko, E., Barrett, L. F., Dickerson, B. C., Schwartz, C. E., & Wedig, M. M. (2006). Neuroanatomical correlates of extraversion and neuroticism. *Cerebral Cortex*, 16(12), 1809–1819. <https://doi.org/10.1093/cercor/bhj118>
- Wu, Y., Li, L., Yuan, B., & Tian, X. (2016). Individual differences in resting-state functional connectivity predict procrastination. *Personality and Individual Differences*, 95(Supplement C), 62–67. <https://doi.org/10.1016/j.paid.2016.02.016>
- Xu, J., & Potenza, M. N. (2012). White matter integrity and five-factor personality measures in healthy adults. *NeuroImage*, 59(1), 800–807.  
<https://doi.org/10.1016/j.neuroimage.2011.07.040>
- Yarkoni, T. (2009). Big Correlations in Little Studies Inflated fMRI Correlations Reflect Low Statistical Power— Commentary on Vul et al. (2009). *Perspectives on Psychological Science: A Journal of the Association for Psychological Science*, 4(3).
- Yarkoni, T. (2015). Neurobiological substrates of personality: A critical overview. In Mikulincer, Mario Shaver, Phillip R. Cooper, M. Lynne Larsen, Randy J. (Ed.), *Personality processes and individual differences* (Vol. 4). American Psychological Association.
- Yarkoni, T., & Westfall, J. (2017). Choosing Prediction Over Explanation in Psychology: Lessons From Machine Learning. *Perspectives on Psychological Science: A Journal of the Association for Psychological Science*, 1745691617693393.  
<https://doi.org/10.1177/1745691617693393>
- Zou, H., & Hastie, T. (2005). Regularization and variable selection via the elastic net. *Journal of the Royal Statistical Society. Series B, Statistical Methodology*, 67(2), 301–320.  
<https://doi.org/10.1111/j.1467-9868.2005.00503.x>
